# Supplementary material
Source: Research Square preprint supplement (doi:10.21203/rs.3.rs-7745471/v1)

**Supporting Information**

High-throughput screening of spin Hall conductivity in 2D materials

Fu Li1, Xiaoxiong Liu3, Vikrant Chaudhary1,2, Ruiwen Xie1, Chen Shen1*, Hao Wang1* and Hongbin Zhang1

1Institute of Materials Science, Technology University of Darmstadt, 64287, Darmstadt, Germany

2Department of Physics and CSMB, Humboldt University of Berlin, 12489, Berlin, Germany

3Department of Physics, Southern University of Science and Technology, 518055, Shenzhen, China

Corresponding author(s). E-mail(s): chenshen@tmm.tu-darmstadt.de;

haowang@tmm.tu-darmstadt.de

**
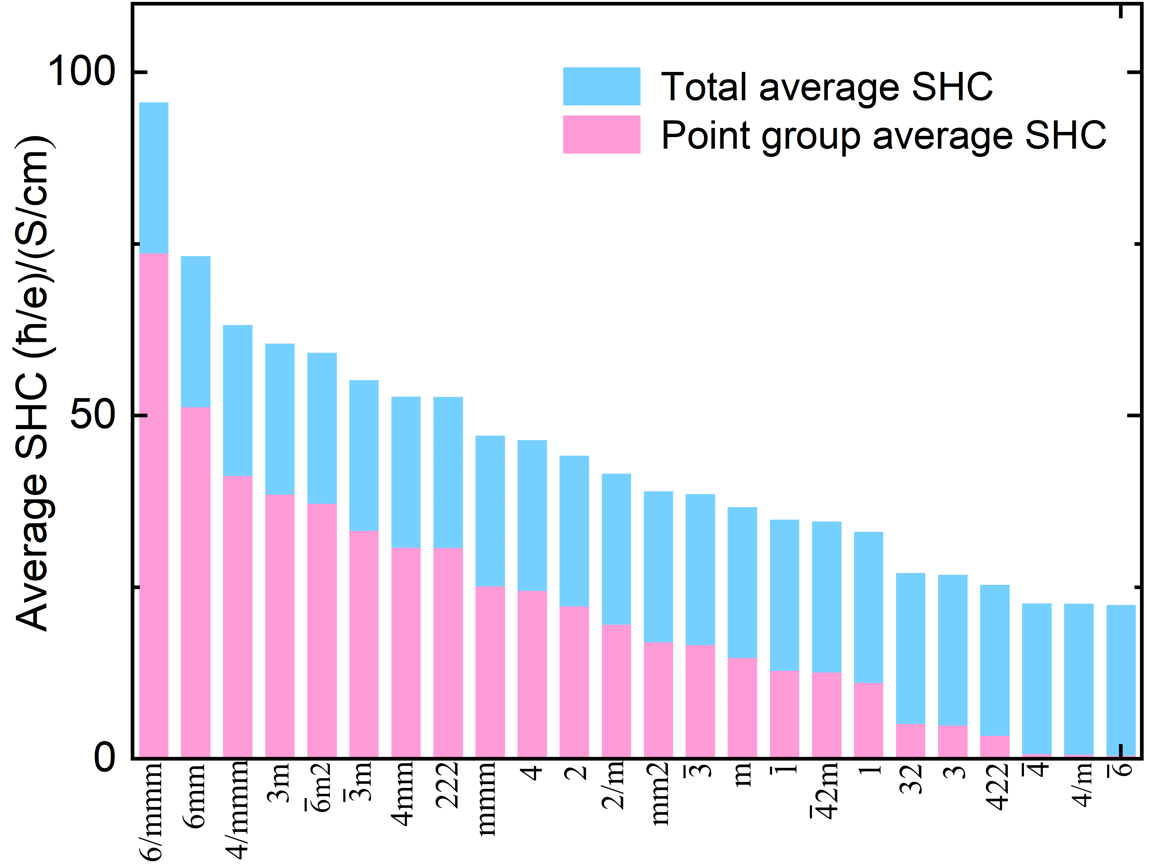
**

Figure S1: Comparison of the average spin Hall conductivity (SHC) for different point groups and the overall average SHC across all materials. The red bars represent the average SHC of individual point groups, while the blue bar indicates the overall average.

Table S1: Summary of the number of mirror operator

| Number of mirror operator | Point group example |
| --- | --- |
| 0 | 1, -1, 2, 222, 4, -4, 3, -3, 6, -6, 432, etc. |
| 1 | m, 2/m, 4/m, 6/m |
| 2 | mm2 |
| 3 | mmm, 3m, m-3 |
| 4 | 4mm, -42m |
| 5 | 4/mmm |
| 6 | -3m, 6mm, -6m2, -43m |
| 7 | 6/mmm |
| 9 | m-3m |


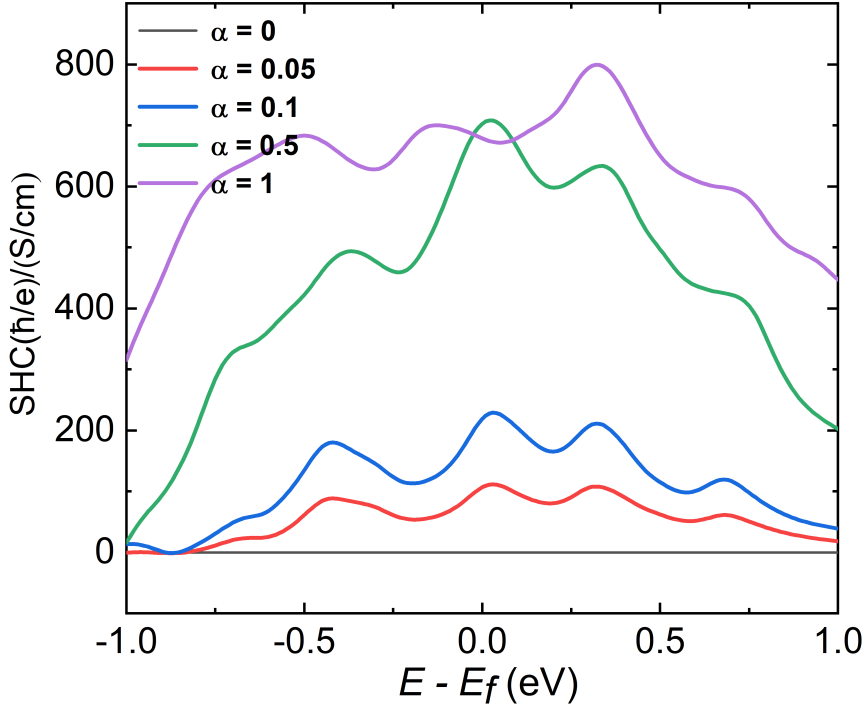


Figure S2: SHC of Bi4Pb3​ computed for different spin–orbit coupling (SOC) strengths: 0.0, 0.05, 0.1, 0.5 and 1.0.


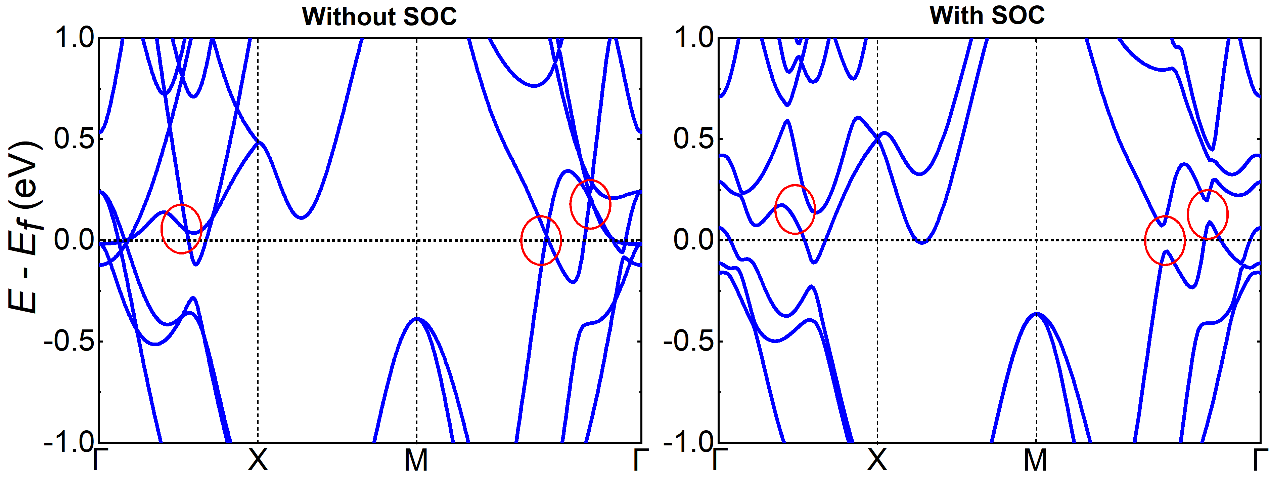


Figure S3: Band structure without and with SOC of Ta2S.


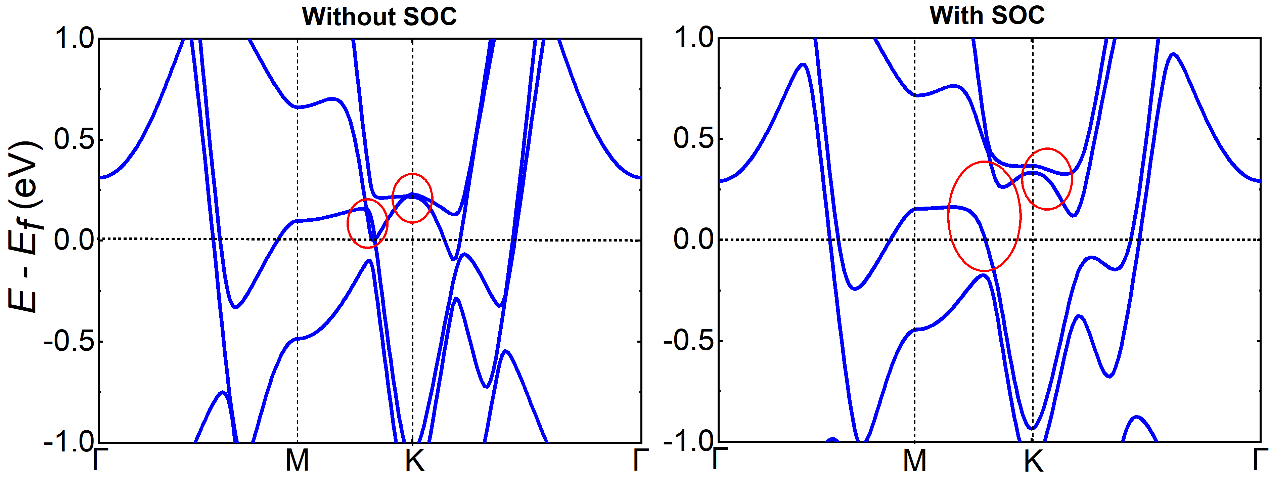


Figure S4: Band structure without and with SOC of CaPb2.


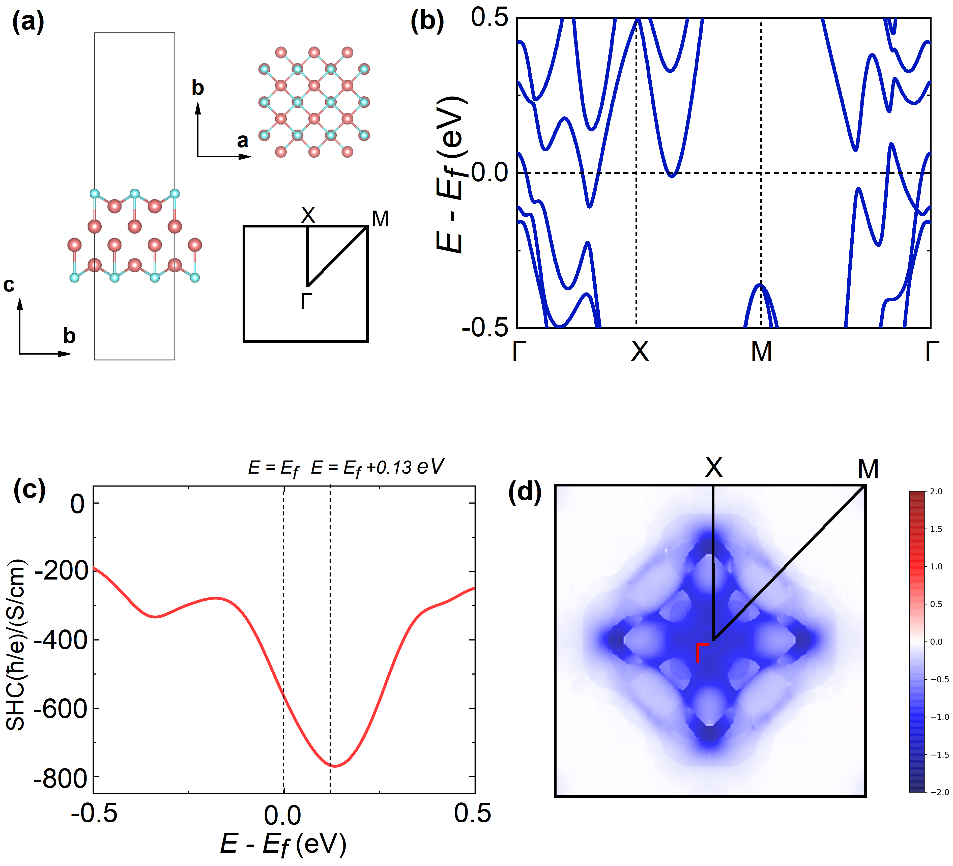


Figure S5: (a) Crystal structure of Ta2S. (b) Band structure of Ta2S with SOC. (c) The red solid line stand for the SHC of Ta2S, and two green dashed vertical lines represent *E* = *EF* and *E* = *EF* + 0.13 eV, respectively. (d) k-resolved SBC in the 2D BZ of Ta2S.


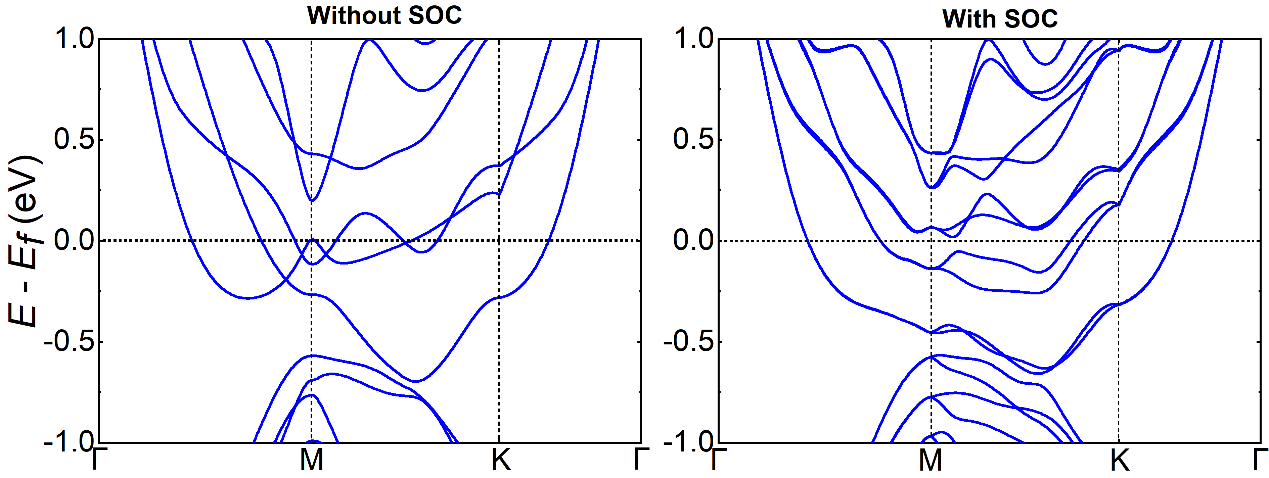


Figure S6: Band structure without and with SOC of Te₃Os₄.


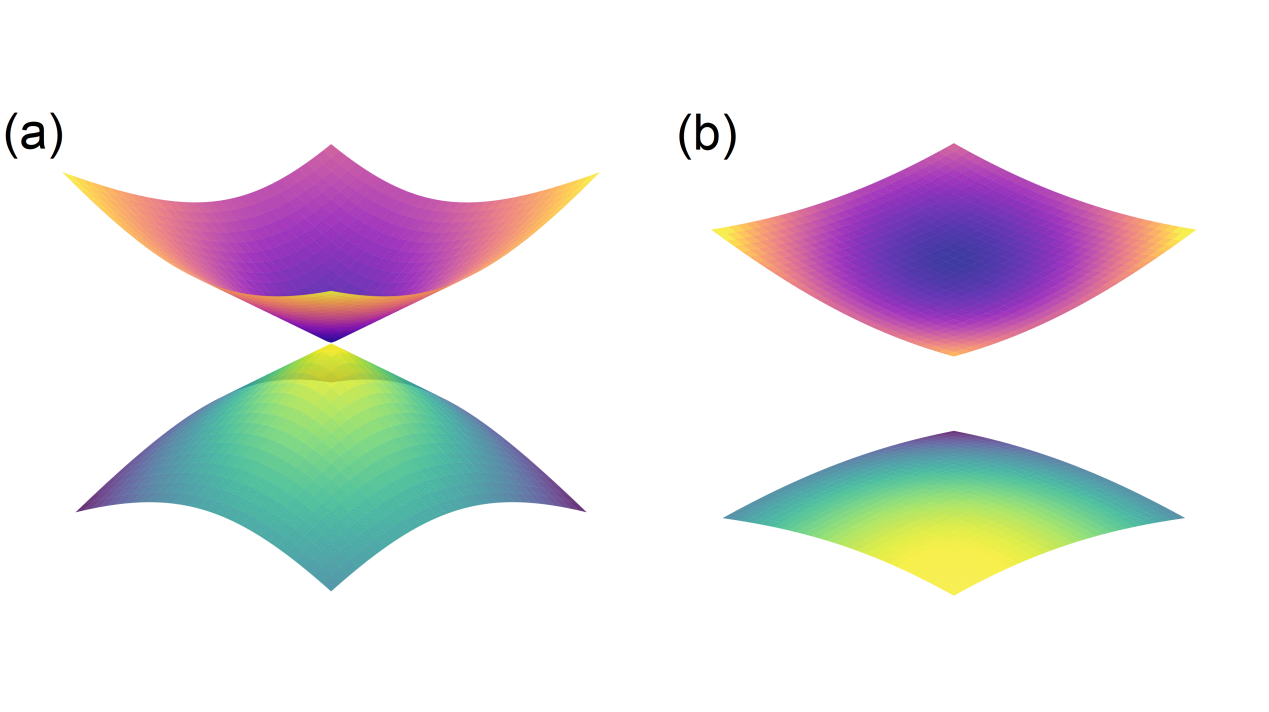


Figure S7: Dirac-like crossings in the three-dimensional bands (a) without and (b) with SOC of PW at the (0.131, 0.131, 0.000) k-point.

**Full List of Screened Topological Insulators:**

Lattice vectors and band structure of GaBi3

|  | *x* (Å) | *y* (Å) | *z* (Å) |
| --- | --- | --- | --- |
| **a1** | 8.7953320799999997 | 0.0000000000000000 | 0.0000000000000000 |
| **a2** | -4.397667040000000 | 7.6169803500000004 | 0.0000000000000000 |
| **a3** | 0.0000000000000000 | 0.0000000000000000 | 21.1982530000000011 |


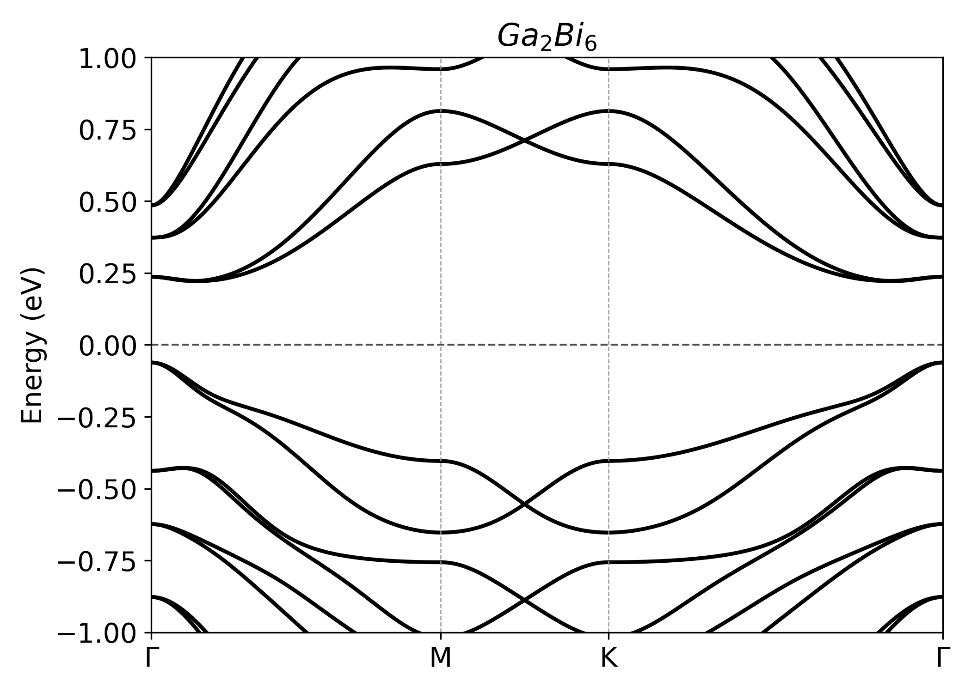


Lattice vectors and band structure of HfSe5

|  | *x* (Å) | *y* (Å) | *z* (Å) |
| --- | --- | --- | --- |
| **a1** | 3.7143579999999998 | 0.0000000000000000 | 0.0000000000000000 |
| **a2** | 0.0000000000000000 | 12.4595230000000008 | 0.0000000000000000 |
| **a3** | 0.0000000000000000 | 0.0000000000000000 | 25.3784990000000015 |


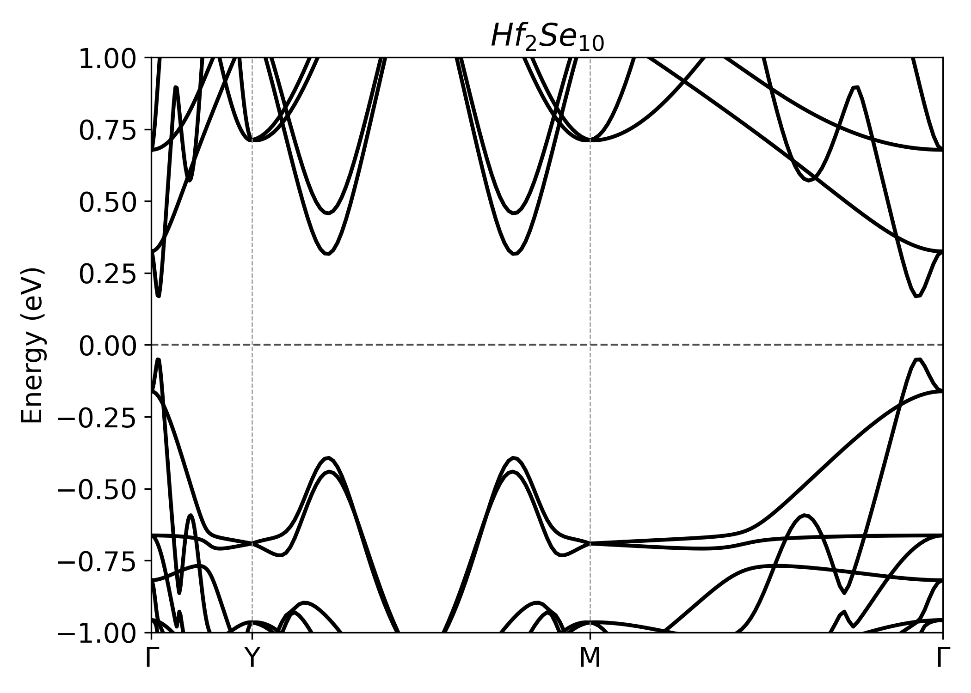


Lattice vectors and band structure of GePb

|  | *x* (Å) | *y* (Å) | *z* (Å) |
| --- | --- | --- | --- |
| **a1** | 4.5214868299999997 | 0.0000000000000000 | 0.0000000000000000 |
| **a2** | -2.260742880000000 | 3.9157217400000000 | 0.0000000000000000 |
| **a3** | 0.0000000000000000 | 0.0000000000000000 | 20.7697469999999988 |


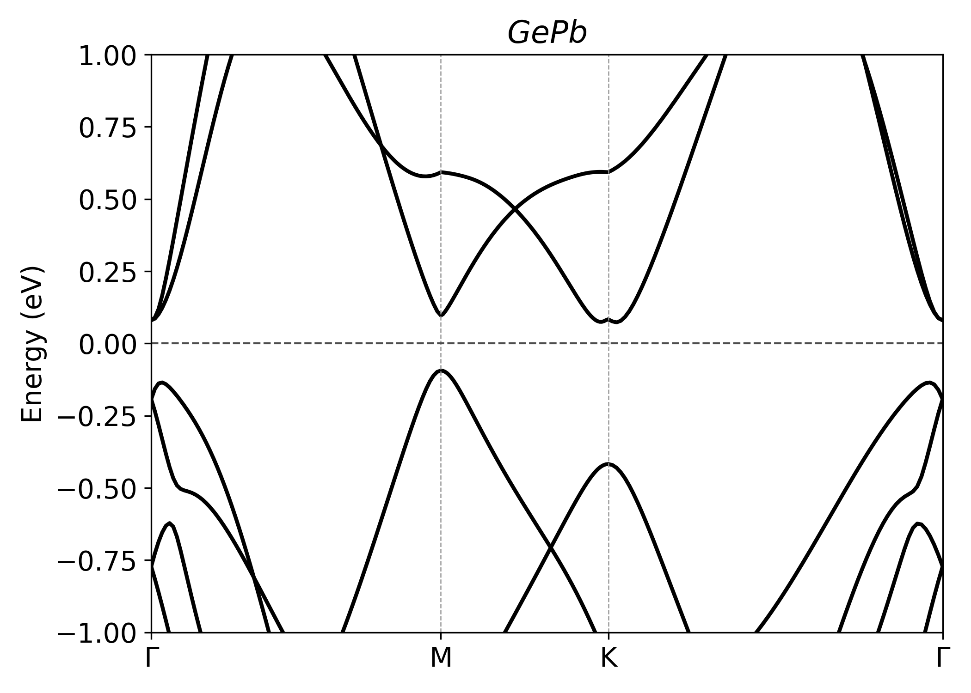


Lattice vectors and band structure of CrP

|  | *x* (Å) | *y* (Å) | *z* (Å) |
| --- | --- | --- | --- |
| **a1** | 3.0012010000000000 | -0.001111000000000 | 0.0941970000000000 |
| **a2** | 0.0315830000000000 | 3.0009260000000002 | 0.0935900000000000 |
| **a3** | -0.780015000000000 | -0.777543000000000 | 23.6499449999999989 |


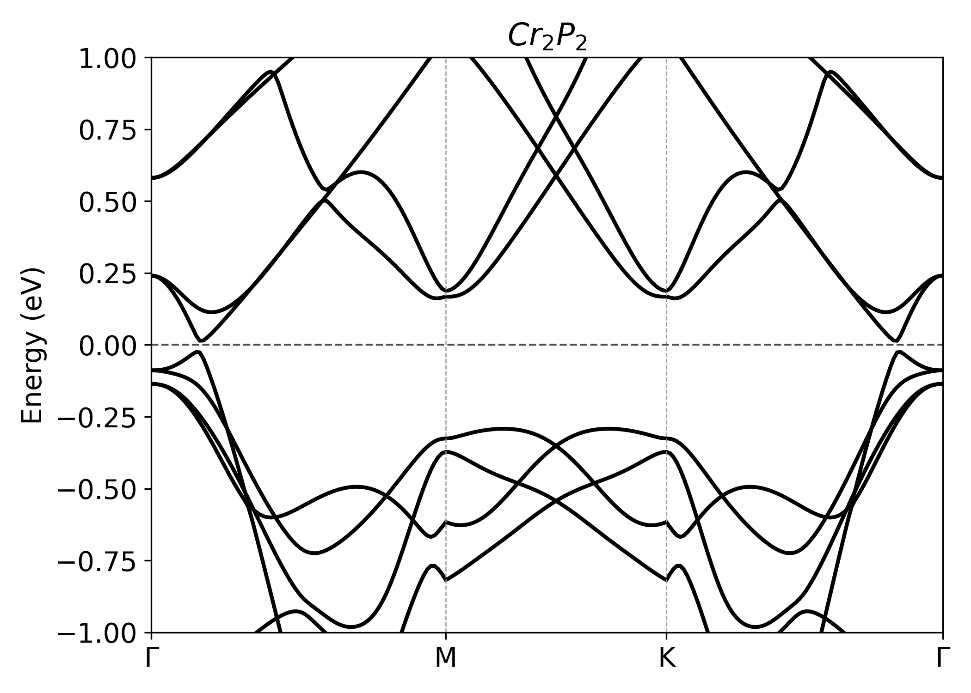


Lattice vectors and band structure of ZrS5

|  | *x* (Å) | *y* (Å) | *z* (Å) |
| --- | --- | --- | --- |
| **a1** | 3.5334767399999998 | 0.0000000000000000 | 0.0000000000000000 |
| **a2** | 0.0000000000000000 | 11.7935498499999998 | 0.0000000000000000 |
| **a3** | 0.0000000000000000 | 0.0000000000000000 | 23.7093699999999998 |


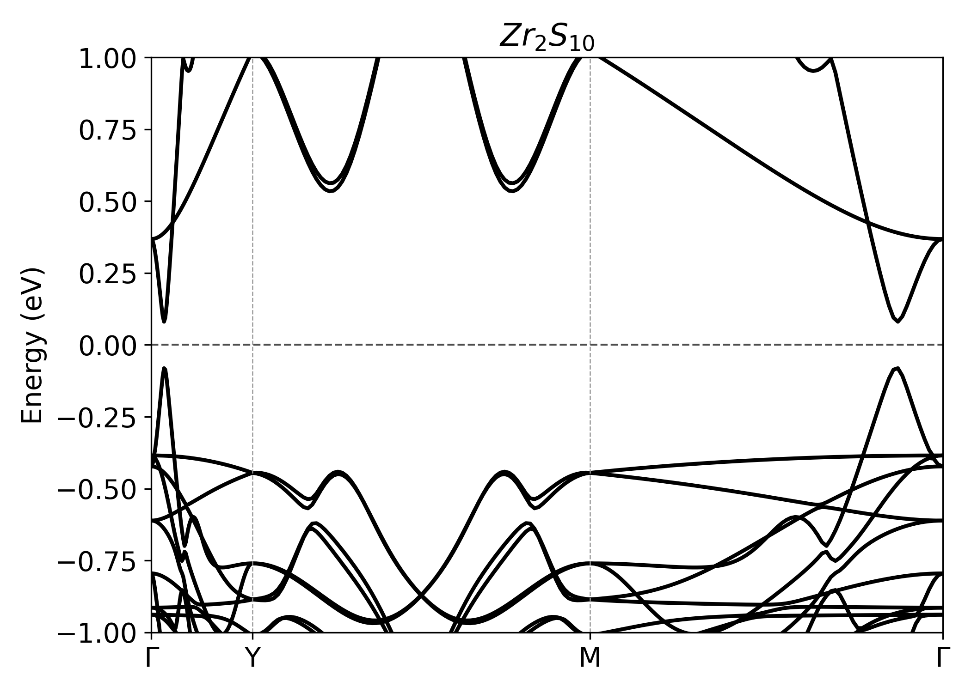


Lattice vectors and band structure of ZrSe5

|  | *x* (Å) | *y* (Å) | *z* (Å) |
| --- | --- | --- | --- |
| **a1** | 3.7395309999999999 | 0.0000000000000000 | 0.0000000000000000 |
| **a2** | 0.0000000000000000 | 12.5056390000000004 | 0.0000000000000000 |
| **a3** | 0.0000000000000000 | 0.0000000000000000 | 25.2975530000000006 |


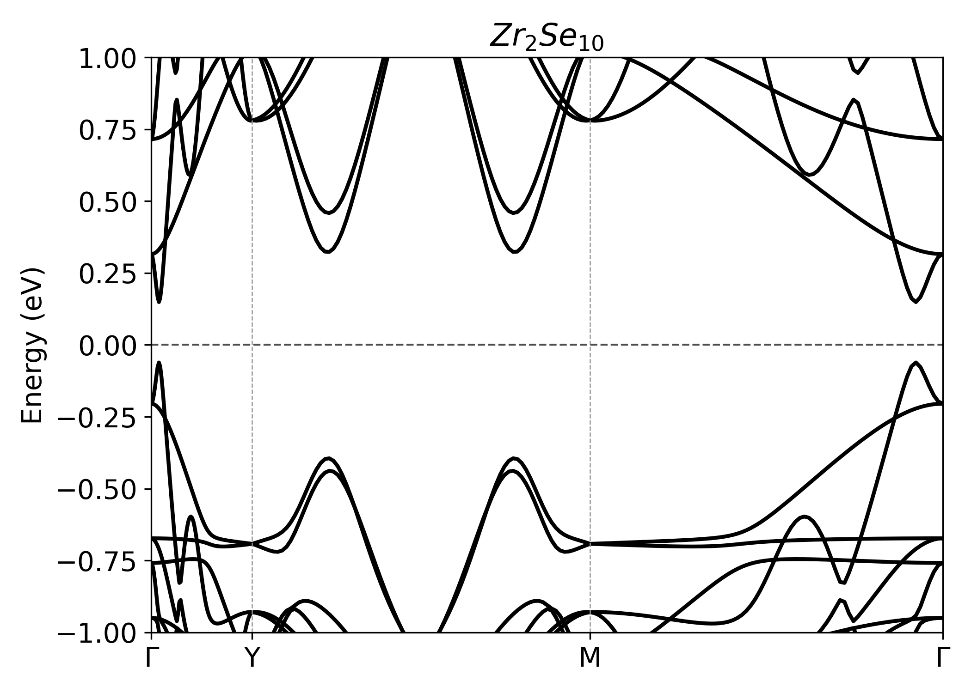


Lattice vectors and band structure of BSb3

|  | *x* (Å) | *y* (Å) | *z* (Å) |
| --- | --- | --- | --- |
| **a1** | 7.8220660000000004 | -0.000181000000000 | -0.000055000000000 |
| **a2** | -3.911189999999999 | 6.7727139999999997 | 0.0005840000000000 |
| **a3** | -0.000151000000000 | 0.0017430000000000 | 21.1982530000000011 |


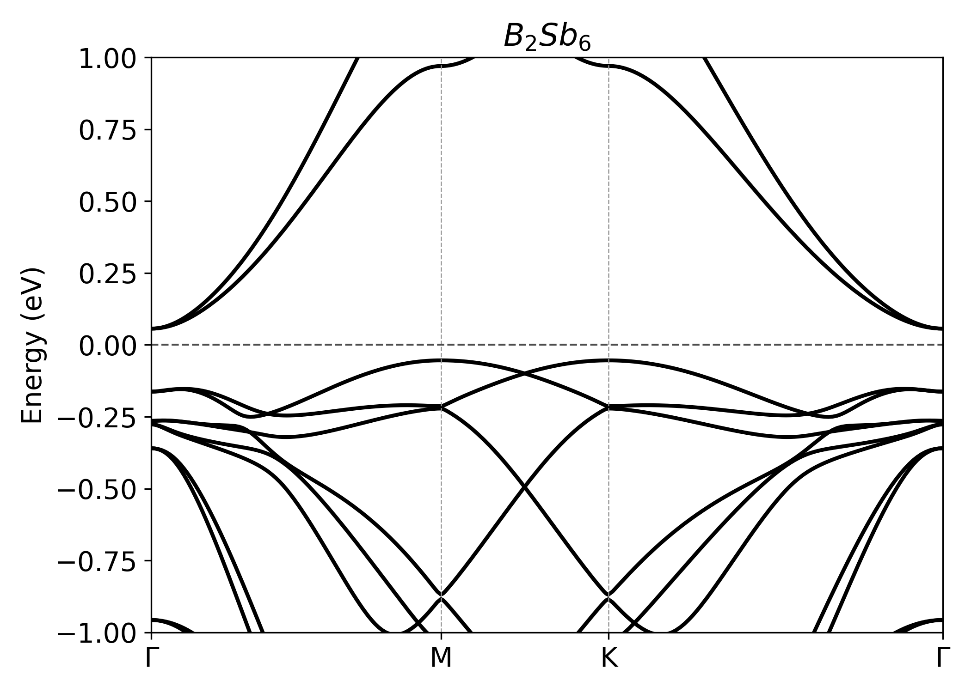


Lattice vectors and band structure of BiSe

|  | *x* (Å) | *y* (Å) | *z* (Å) |
| --- | --- | --- | --- |
| **a1** | 7.7420530999999997 | 0.0000000000000000 | 0.0000000000000000 |
| **a2** | 0.0000000000000000 | 7.3424410299999998 | 0.0000000000000000 |
| **a3** | 0.0000000000000000 | 0.0000000000000000 | 22.0755000000000017 |


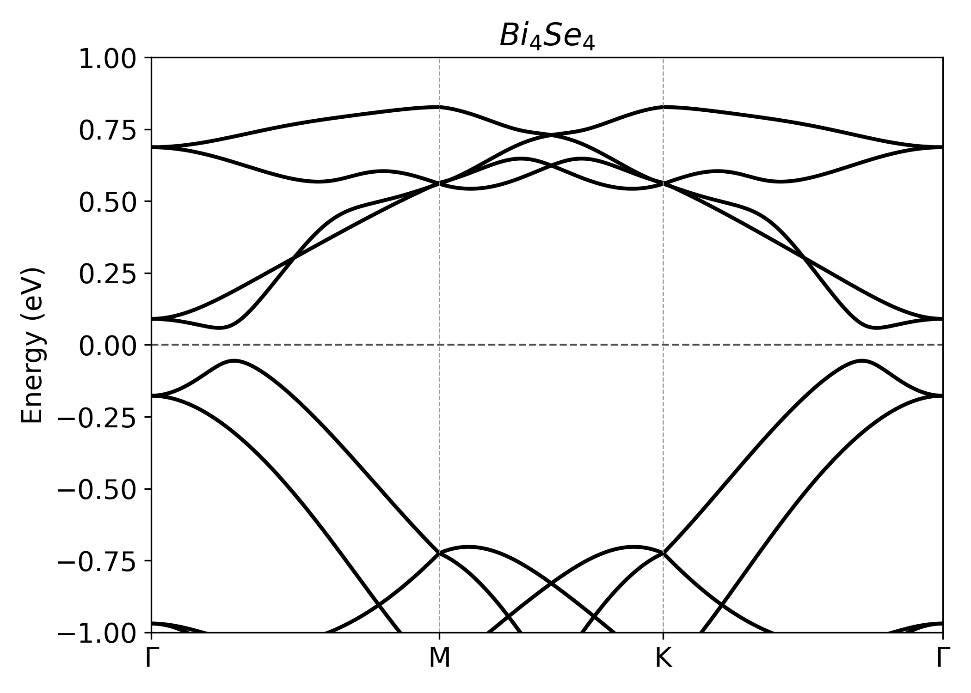


Lattice vectors and band structure of NaMgSb

|  | *x* (Å) | *y* (Å) | *z* (Å) |
| --- | --- | --- | --- |
| **a1** | 4.8554656100000004 | 0.0000000000000000 | 0.0000000000000000 |
| **a2** | 0.0000000000000000 | 4.8554656100000004 | 0.0000000000000000 |
| **a3** | 0.0000000000000000 | 0.0000000000000000 | 26.8963816899999983 |


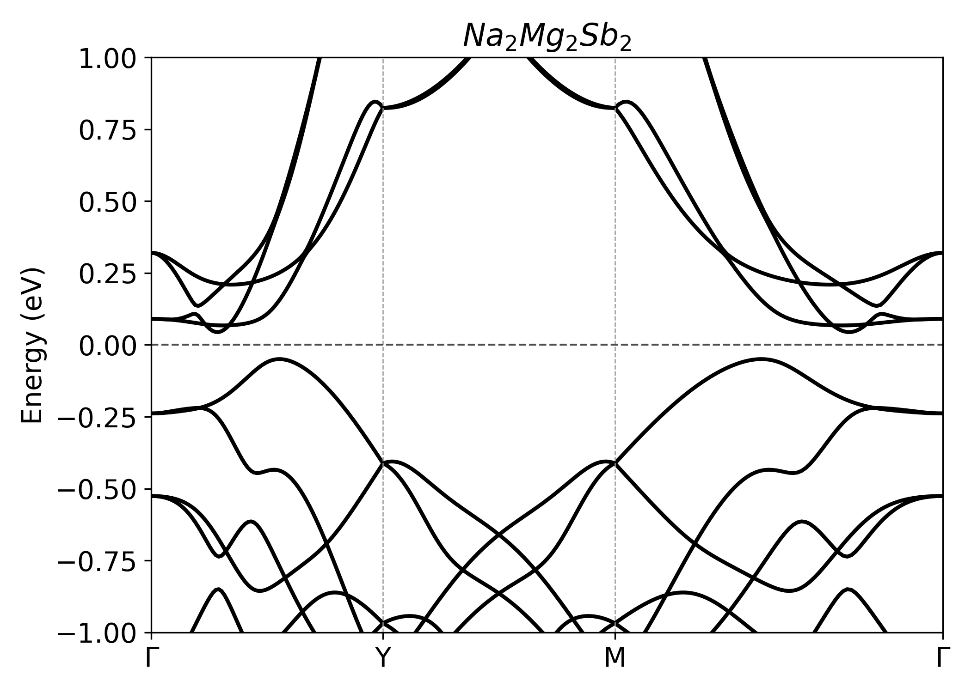


Lattice vectors and band structure of InBi3

|  | *x* (Å) | *y* (Å) | *z* (Å) |
| --- | --- | --- | --- |
| **a1** | 9.0892054600000005 | -0.000000120000000 | 0.0000000000000000 |
| **a2** | -4.544603430000000 | 7.8714828099999998 | 0.0000000000000000 |
| **a3** | 0.0000000000000000 | 0.0000000000000000 | 21.1982530000000011 |


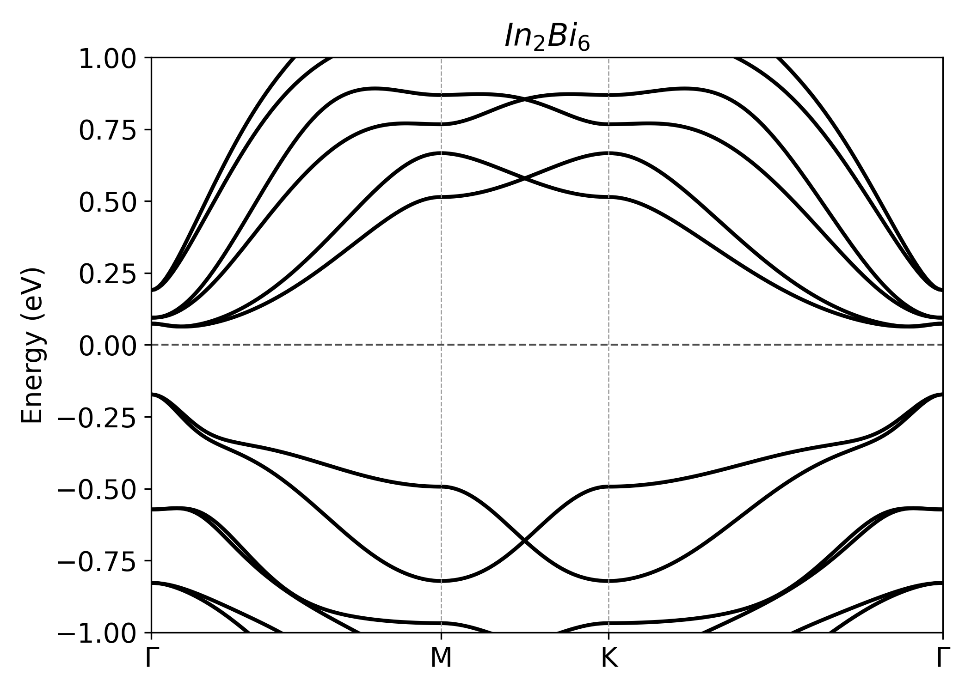


Lattice vectors and band structure of AlBi3

|  | *x* (Å) | *y* (Å) | *z* (Å) |
| --- | --- | --- | --- |
| **a1** | 8.8458998300000005 | 0.0000000000000000 | 0.0000000000000000 |
| **a2** | -4.422950410000000 | 7.6607736099999997 | 0.0000000000000000 |
| **a3** | 0. 000000000000000 | 0. 000000000000000 | 21.1982530000000011 |


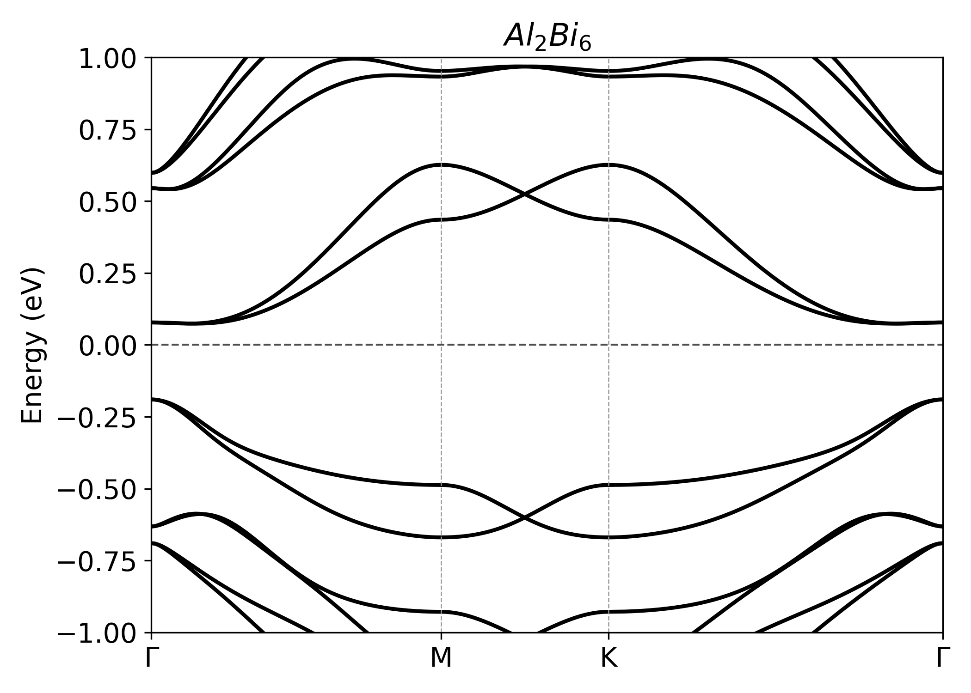


Lattice vectors and band structure of SrSbSe2F

|  | *x* (Å) | *y* (Å) | *z* (Å) |
| --- | --- | --- | --- |
| **a1** | 4.0993773200000003 | 0.0000000000000000 | 0.0000000000000000 |
| **a2** | 0.0000000000000000 | 4.0993773200000003 | 0.0000000000000000 |
| **a3** | 0.0000000000000000 | 0.0000000000000000 | 31.4330810000000014 |


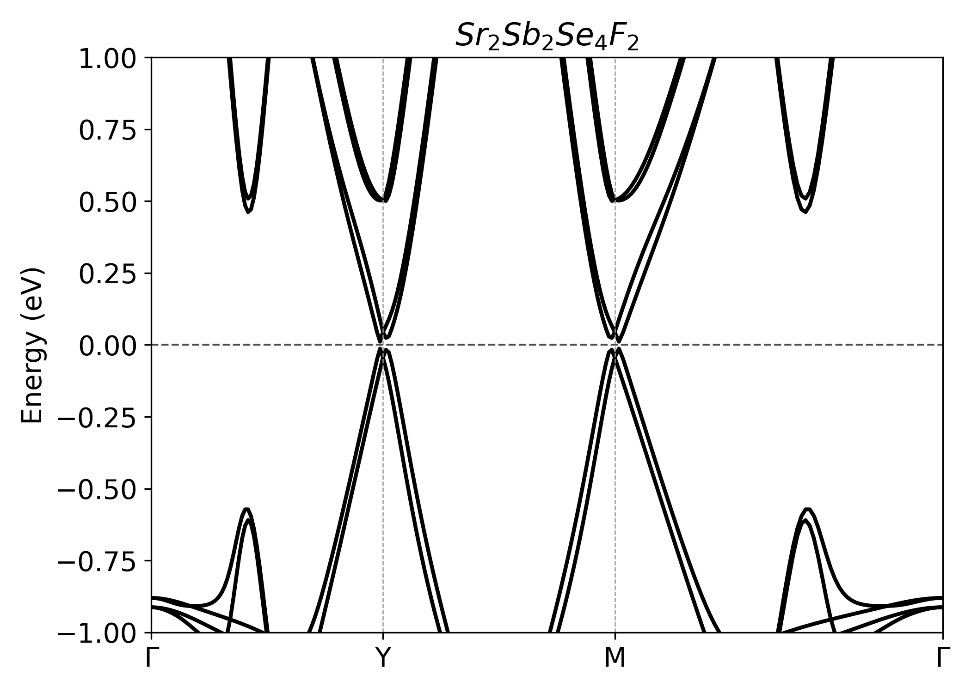


Lattice vectors and band structure of YbBi2

|  | *x* (Å) | *y* (Å) | *z* (Å) |
| --- | --- | --- | --- |
| **a1** | 4.1754122100000002 | 0.0000000000000000 | 0.0000000000000000 |
| **a2** | 0.0000000000000000 | 5.1621684800000001 | 0.0000000000000000 |
| **a3** | 0.0000000000000000 | 0.0000000000000000 | 23.0479948199999995 |


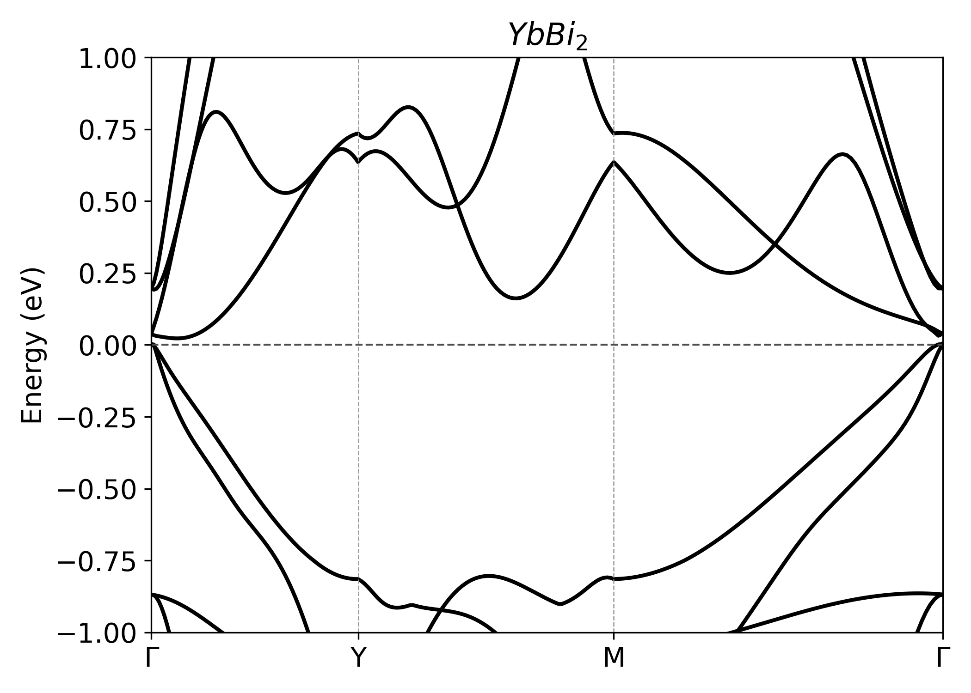


Lattice vectors and band structure of TaI5

|  | *x* (Å) | *y* (Å) | *z* (Å) |
| --- | --- | --- | --- |
| **a1** | 3.7530090000000000 | 0.0289320000000000 | -0.0059960000000000 |
| **a2** | 0.0173710000000000 | 10.8266559999999998 | 0.1640670000000000 |
| **a3** | 0.0266790000000000 | 0.2687750000000000 | 23.7404919999999997 |


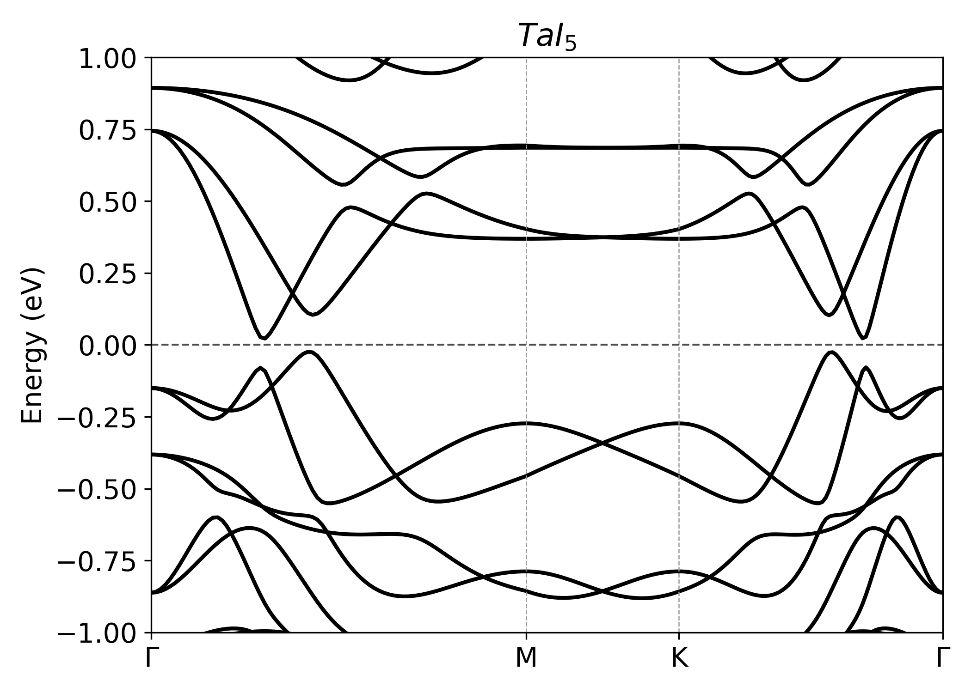


Lattice vectors and band structure of AuBr

|  | *x* (Å) | *y* (Å) | *z* (Å) |
| --- | --- | --- | --- |
| **a1** | 4.4788670000000002 | 0.0000000000000000 | 0.0000000000000000 |
| **a2** | -2.239434000000000 | 3.8788130000000001 | 0.0000000000000000 |
| **a3** | 0.0000000000000000 | 0.0000000000000000 | 20.1955199999999984 |


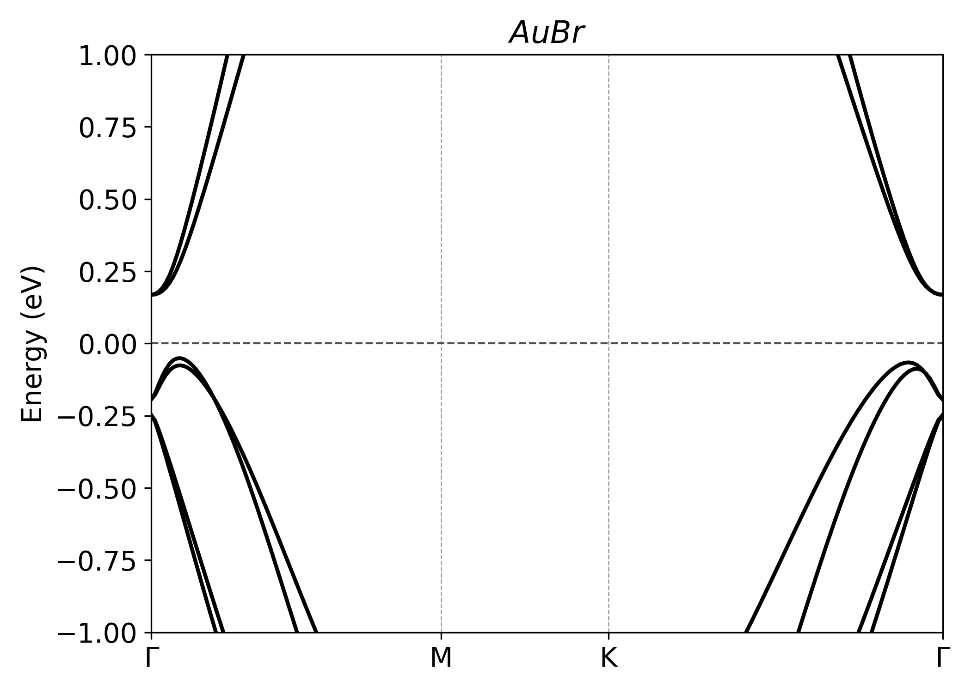


Lattice vectors and band structure of NbTe4Ir

|  | *x* (Å) | *y* (Å) | *z* (Å) |
| --- | --- | --- | --- |
| **a1** | 3.7946973700000002 | 0.0000000000000000 | 0.0000000000000000 |
| **a2** | 0.0000000000000000 | 12.5864946300000007 | 0.0000000000000000 |
| **a3** | 0.0000000000000000 | 0.0000000000000000 | 24.0001439999999988 |


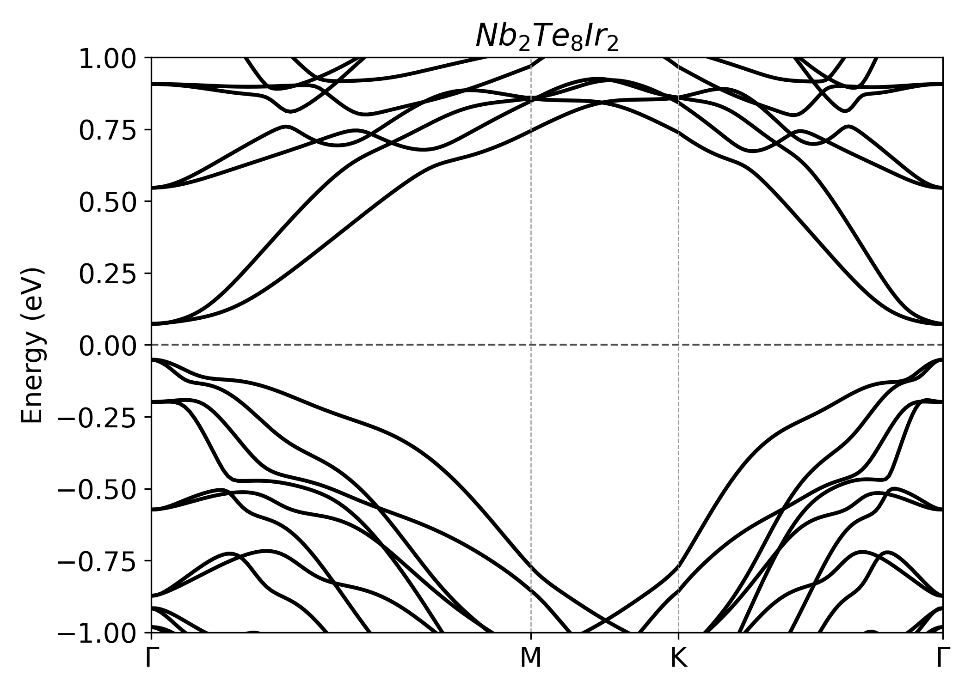


Lattice vectors and band structure of Cu2Te

|  | *x* (Å) | *y* (Å) | *z* (Å) |
| --- | --- | --- | --- |
| **a1** | 4.9124049999999997 | 0.0000000000000000 | 0.0000000000000000 |
| **a2** | 0.0000000000000000 | 4.7459300000000004 | -1.3565929999999999 |
| **a3** | -0.000151000000000 | 0.0017430000000000 | 21.1982530000000011 |


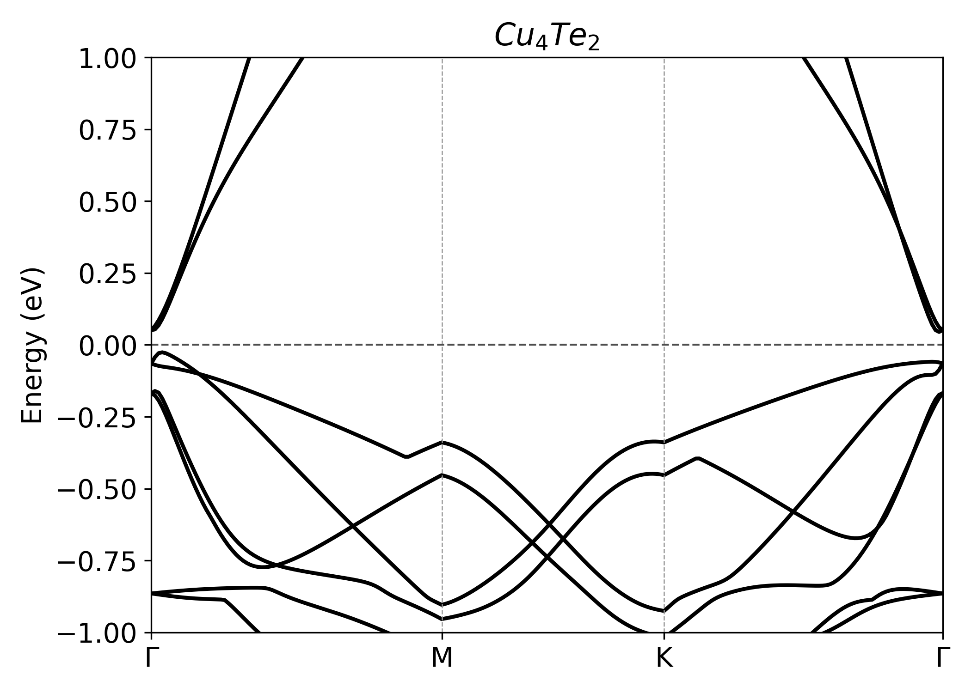


Lattice vectors and band structure of Ta2Se3

|  | *x* (Å) | *y* (Å) | *z* (Å) |
| --- | --- | --- | --- |
| **a1** | 3.3669683400000001 | -0.000009530000000 | -0.0003212600000000 |
| **a2** | 0.0002191100000000 | 9.6937915799999992 | 1.9395309400000000 |
| **a3** | -0.00025142000000 | -0.071930110000000 | 24.1657083700000008 |


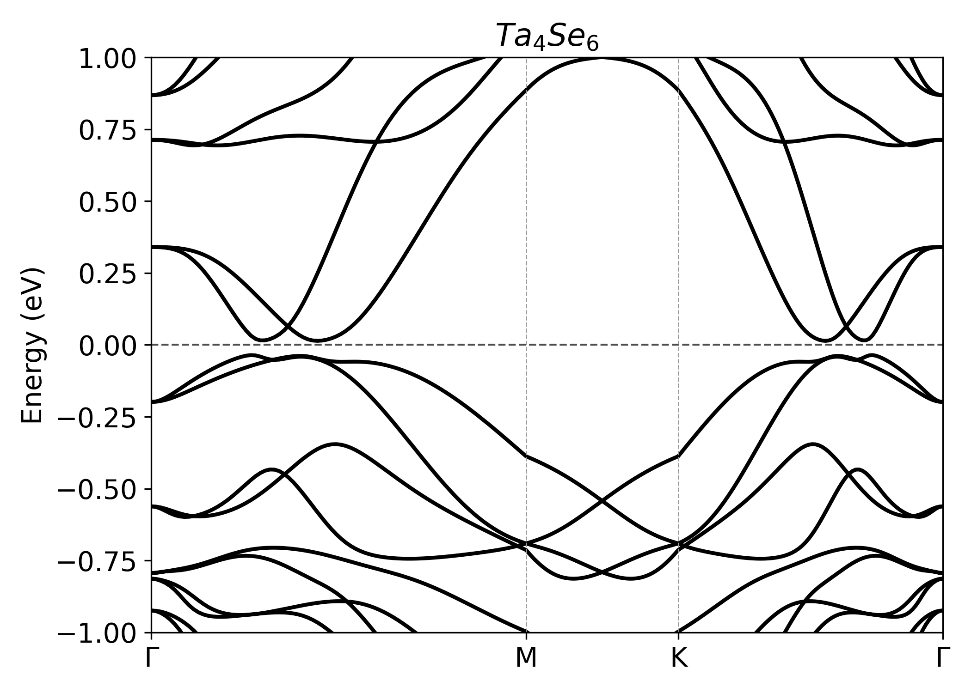


Lattice vectors and band structure of AuI

|  | *x* (Å) | *y* (Å) | *z* (Å) |
| --- | --- | --- | --- |
| **a1** | 4.7010169599999996 | 0.0000000000000000 | 0.0000000000000000 |
| **a2** | -2.350509479999999 | 4.0711991899999997 | 0.0000000000000000 |
| **a3** | 0.0000000000000000 | 0.0000000000000000 | 20.0000000000000000 |


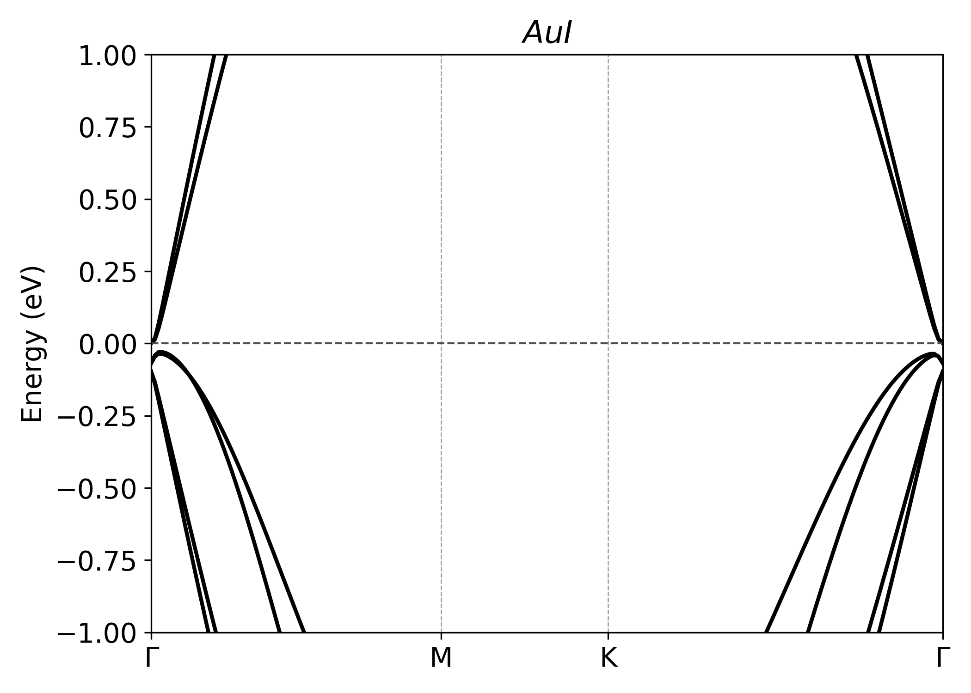


Lattice vectors and band structure of Pb

|  | *x* (Å) | *y* (Å) | *z* (Å) |
| --- | --- | --- | --- |
| **a1** | 4.8907097000000004 | 0.0000000000000000 | 0.0000000000000000 |
| **a2** | -2.445354850000000 | 4.2720334500000003 | 0.0000000000000000 |
| **a3** | 0.0000000000000000 | 0.0000000000000000 | 20.6882279999999987 |


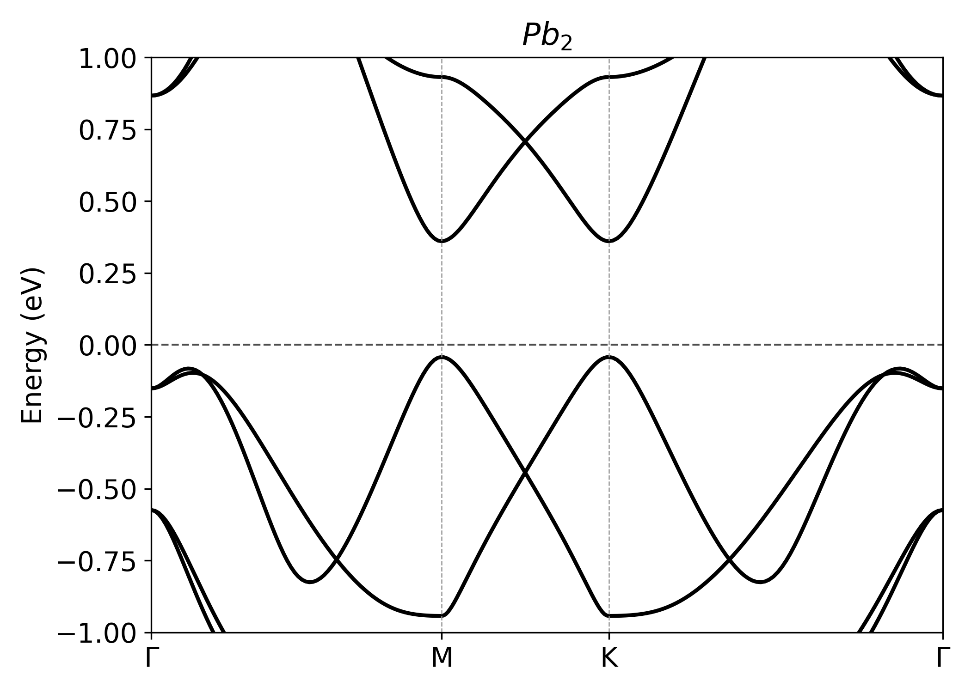


Lattice vectors and band structure of HgO

|  | *x* (Å) | *y* (Å) | *z* (Å) |
| --- | --- | --- | --- |
| **a1** | 3.7690667800000002 | 0.0000000000000000 | 0.0000000000000000 |
| **a2** | -1.884533390000000 | 3.2641072499999999 | 0.0000000000000000 |
| **a3** | 0.0000000000000000 | 0.0000000000000000 | 20.6349209999999985 |


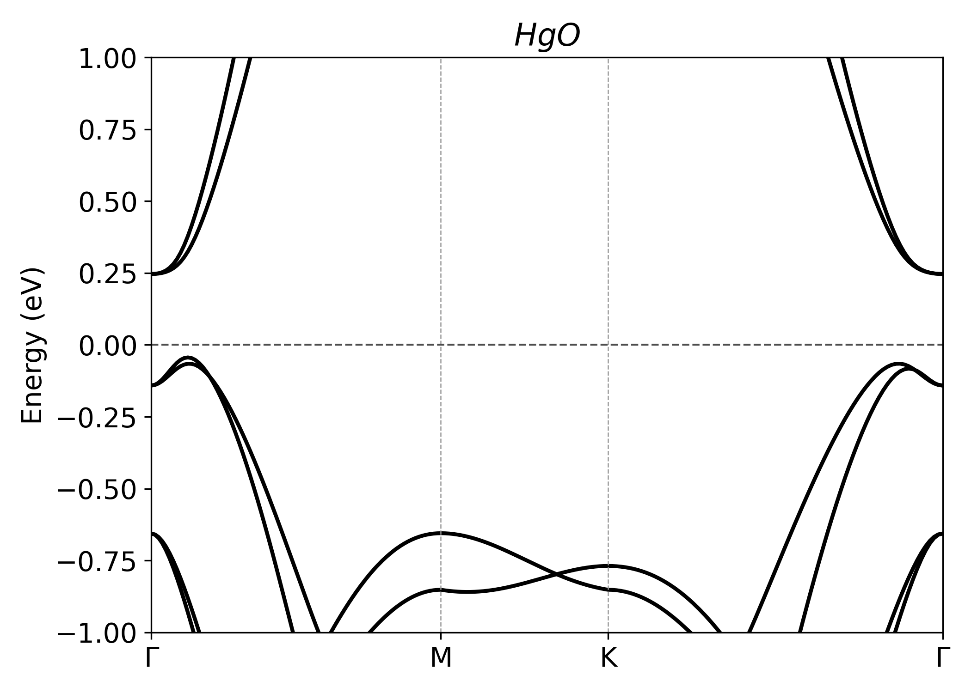


Lattice vectors and band structure of Tl2Te3

|  | *x* (Å) | *y* (Å) | *z* (Å) |
| --- | --- | --- | --- |
| **a1** | 7.6898567399999997 | -0.037079290000000 | 0.0005671700000000 |
| **a2** | -3.877039110000000 | 6.6414011000000004 | -0.000031080000000 |
| **a3** | 0.0014782700000000 | 0.000754530000000 | 20.0118290499999993 |


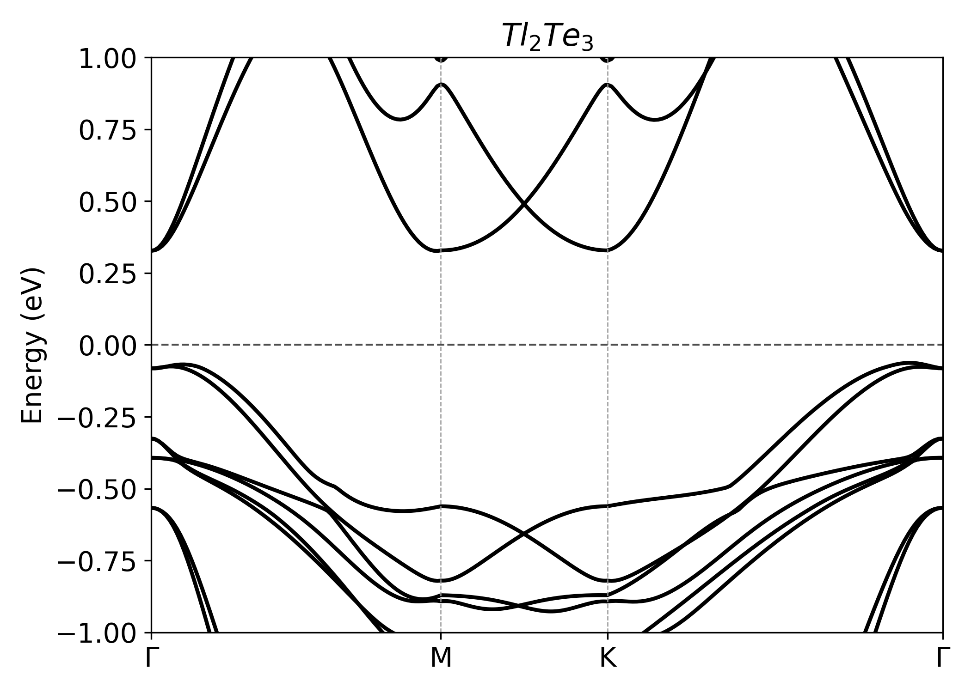


Lattice vectors and band structure of EuBi2

|  | *x* (Å) | *y* (Å) | *z* (Å) |
| --- | --- | --- | --- |
| **a1** | 4.2655062199999998 | 0.0000000000000000 | 0.0000000000000000 |
| **a2** | 0.0000000000000000 | 5.3038907000000002 | -0.2373712900000000 |
| **a3** | 0.0000000000000000 | 0.0394084300000000 | 23.1733267800000000 |


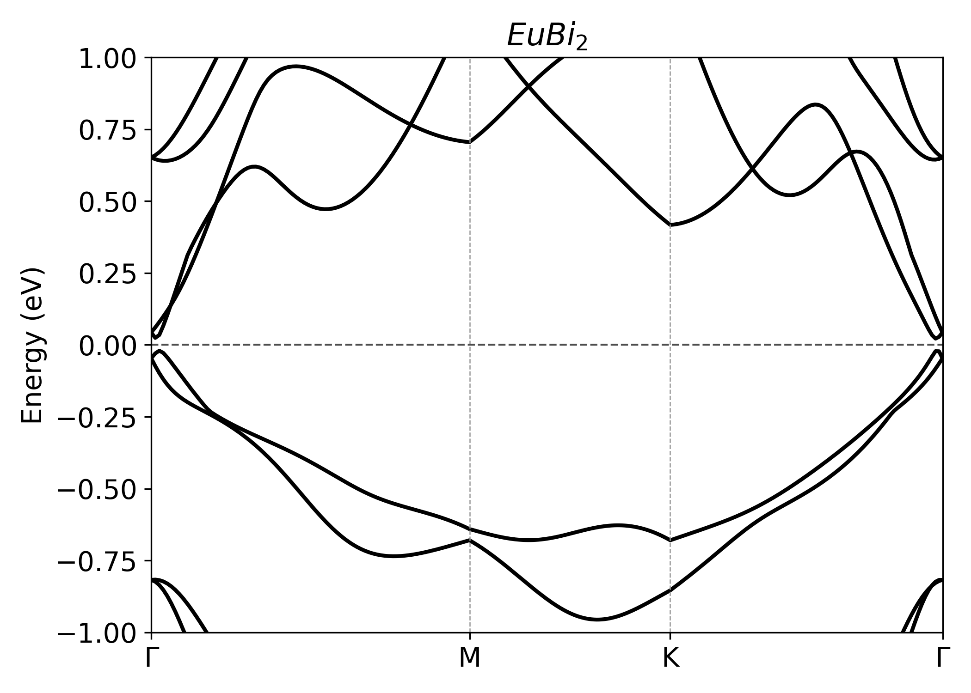


Lattice vectors and band structure of TiSe5

|  | *x* (Å) | *y* (Å) | *z* (Å) |
| --- | --- | --- | --- |
| **a1** | 3.5908099099999999 | 0.0000000000000000 | 0.0000000000000000 |
| **a2** | 0.0000000000000000 | 12.3180775100000002 | 0.0000000000000000 |
| **a3** | 0.0000000000000000 | 0.0000000000000000 | 25.2975530000000006 |


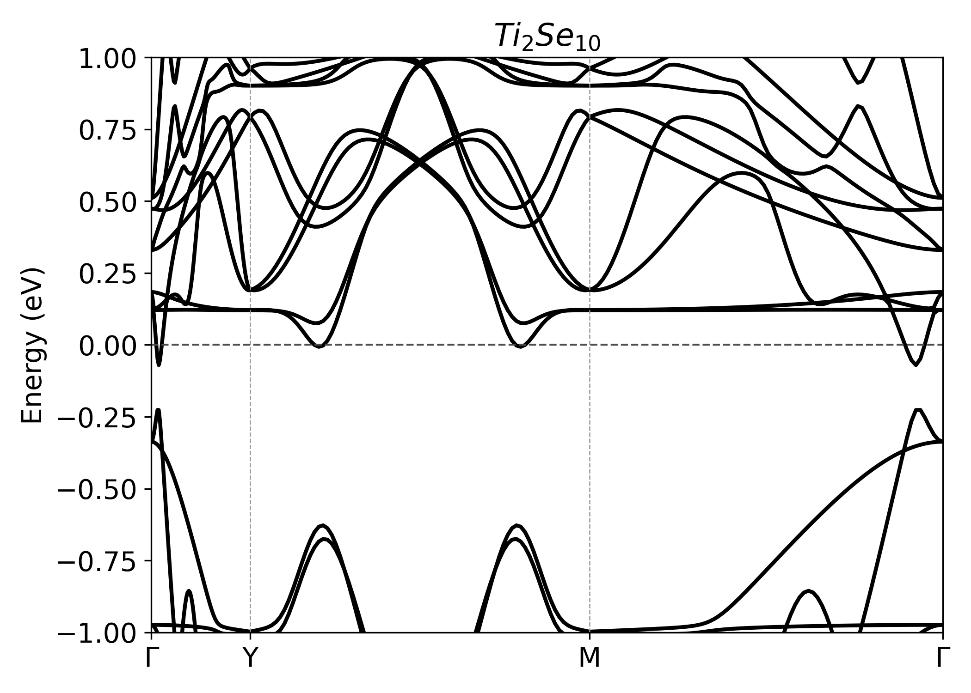


Lattice vectors and band structure of SnPb

|  | *x* (Å) | *y* (Å) | *z* (Å) |
| --- | --- | --- | --- |
| **a1** | 4.7995473799999999 | 0.0000000000000000 | 0.0000000000000000 |
| **a2** | -2.399773090000000 | 4.1565291000000002 | 0.0000000000000000 |
| **a3** | 0.0000000000000000 | 0.0000000000000000 | 20.7697469999999988 |


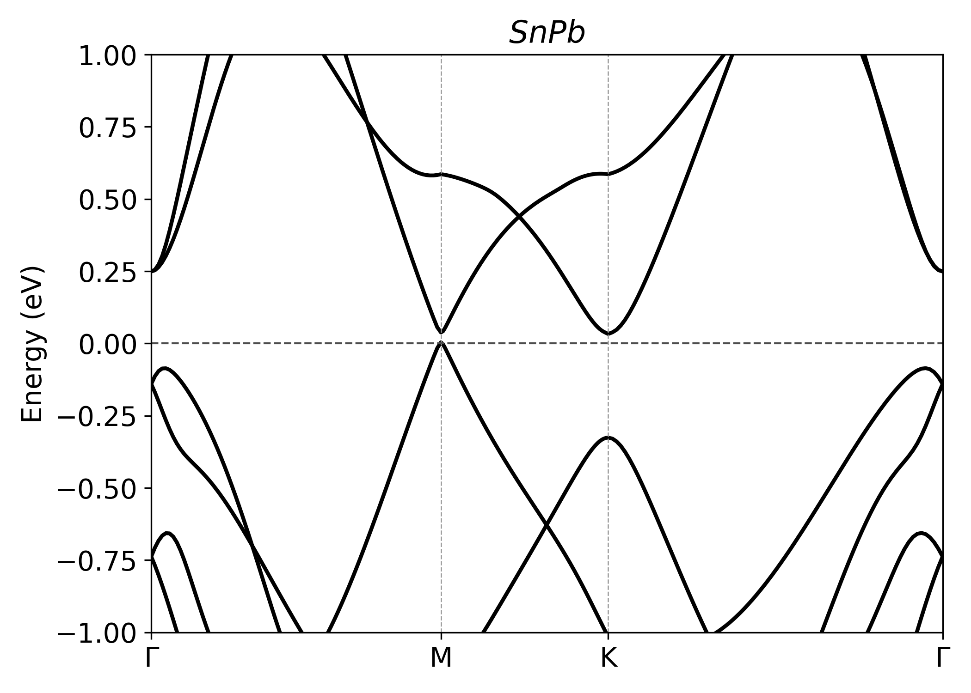


Lattice vectors and band structure of ZrTe5

|  | *x* (Å) | *y* (Å) | *z* (Å) |
| --- | --- | --- | --- |
| **a1** | 4.0530077400000000 | 0.0000000000000000 | 0.0000000000000000 |
| **a2** | 0.0000000000000000 | 13.8694415299999996 | 0.0000000000000000 |
| **a3** | 0.0000000000000000 | 0.0000000000000000 | 25.4220332300000003 |


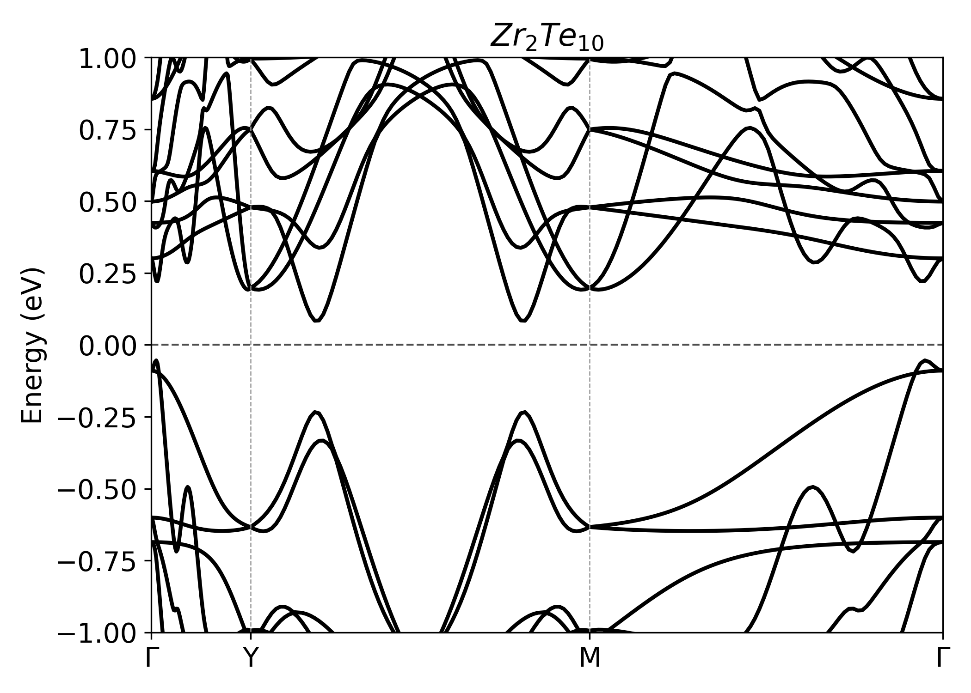


Lattice vectors and band structure of HfTe5

|  | *x* (Å) | *y* (Å) | *z* (Å) |
| --- | --- | --- | --- |
| **a1** | 4.0282380699999996 | 0.0000000000000000 | 0.0000000000000000 |
| **a2** | 0.0000000000000000 | 13.8604544000000001 | 0.0000000000000000 |
| **a3** | 0.0000000000000000 | 0.0000000000000000 | 25.2975840000000005 |


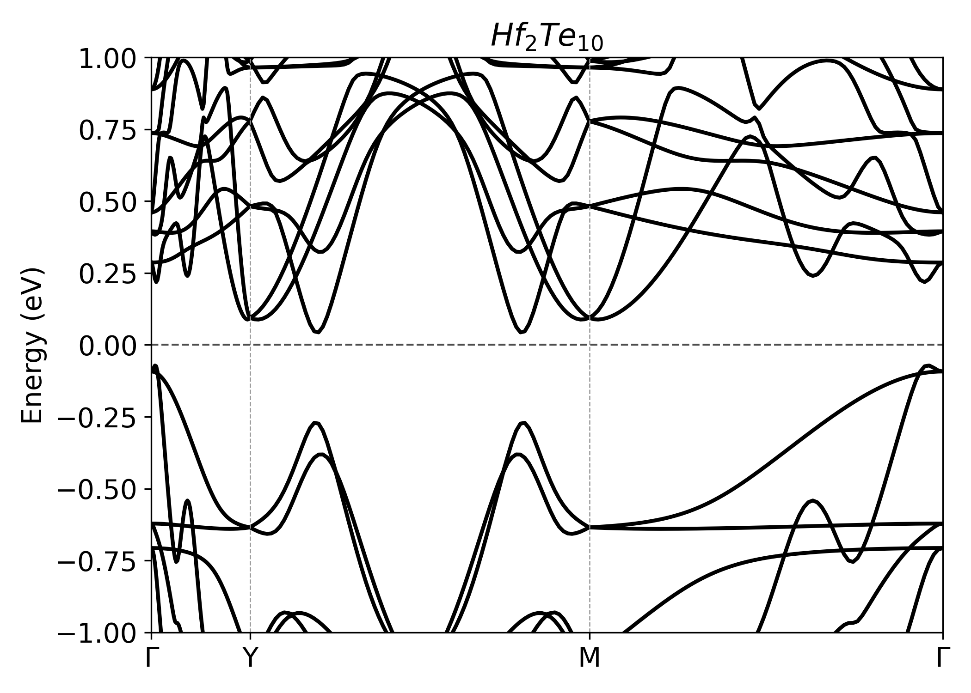


Lattice vectors and band structure of EuAs2

|  | *x* (Å) | *y* (Å) | *z* (Å) |
| --- | --- | --- | --- |
| **a1** | 3.7673929899999998 | 0.0000000000000000 | 0.0000000000000000 |
| **a2** | 0.0000000000000000 | 4.9166714899999997 | 0.0000000000000000 |
| **a3** | 0.0000000000000000 | -0.010691840000000 | 23.1722685599999991 |


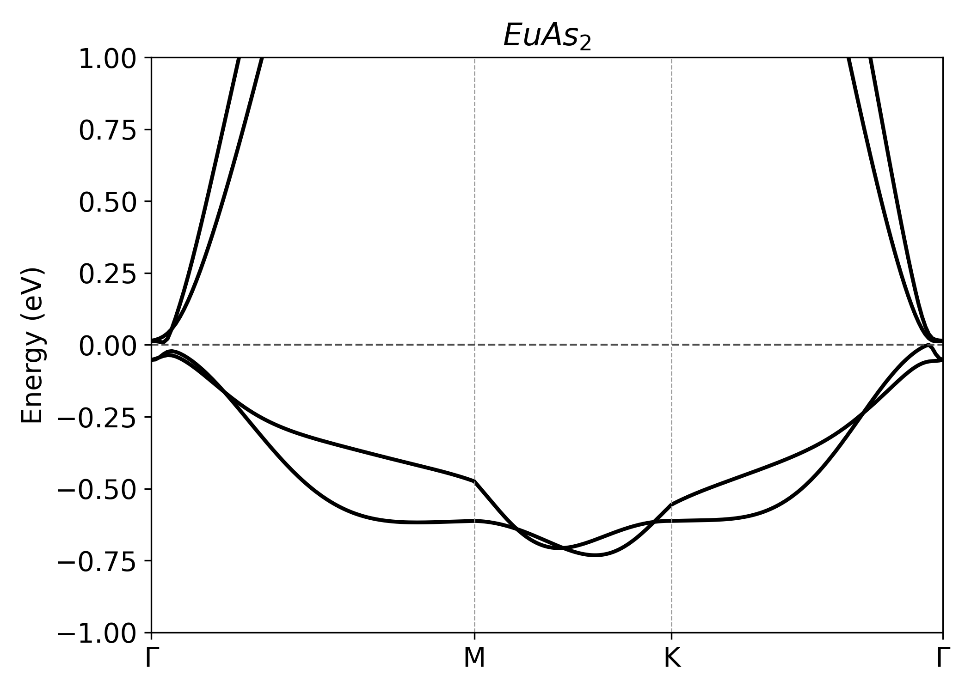


Lattice vectors and band structure of V2Se3

|  | *x* (Å) | *y* (Å) | *z* (Å) |
| --- | --- | --- | --- |
| **a1** | 3.2175180000000001 | 0.0022180600000000 | -0.0039827000000000 |
| **a2** | 1.6067597300000001 | 9.4233658600000005 | 0.3345847100000000 |
| **a3** | 0.0098896400000000 | -0.035210370000000 | 24.9735266299999985 |


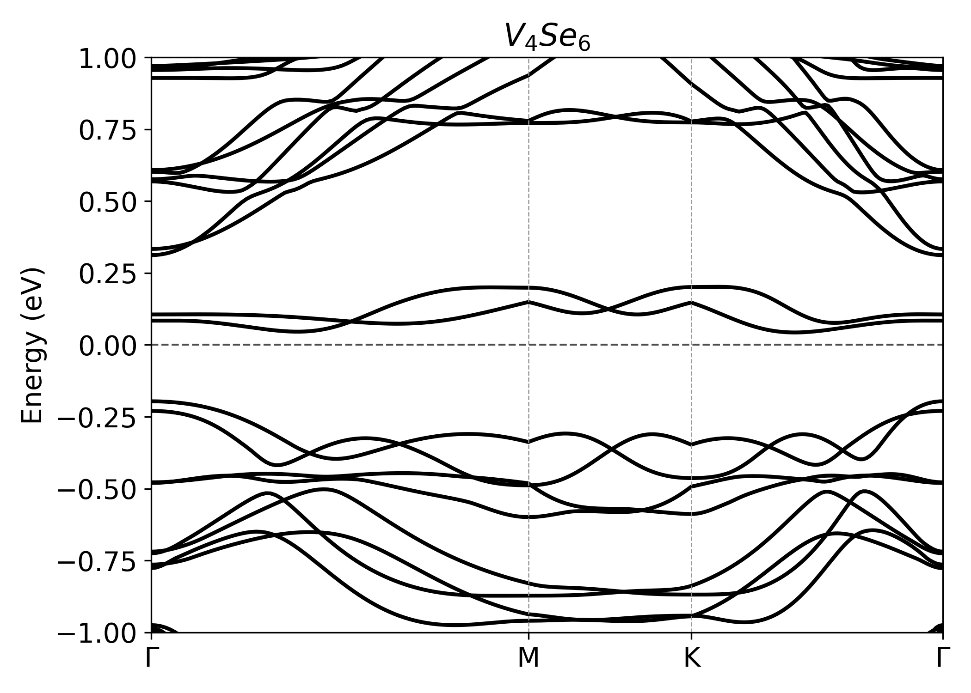


Lattice vectors and band structure of AuF

|  | *x* (Å) | *y* (Å) | *z* (Å) |
| --- | --- | --- | --- |
| **a1** | 3.9157996300000000 | 0.0000000000000000 | 0.0000000000000000 |
| **a2** | -1.957899300000000 | 3.3911813300000002 | 0.0000000000000000 |
| **a3** | 0.0000000000000000 | 0.0000000000000000 | 20.1955199999999984 |


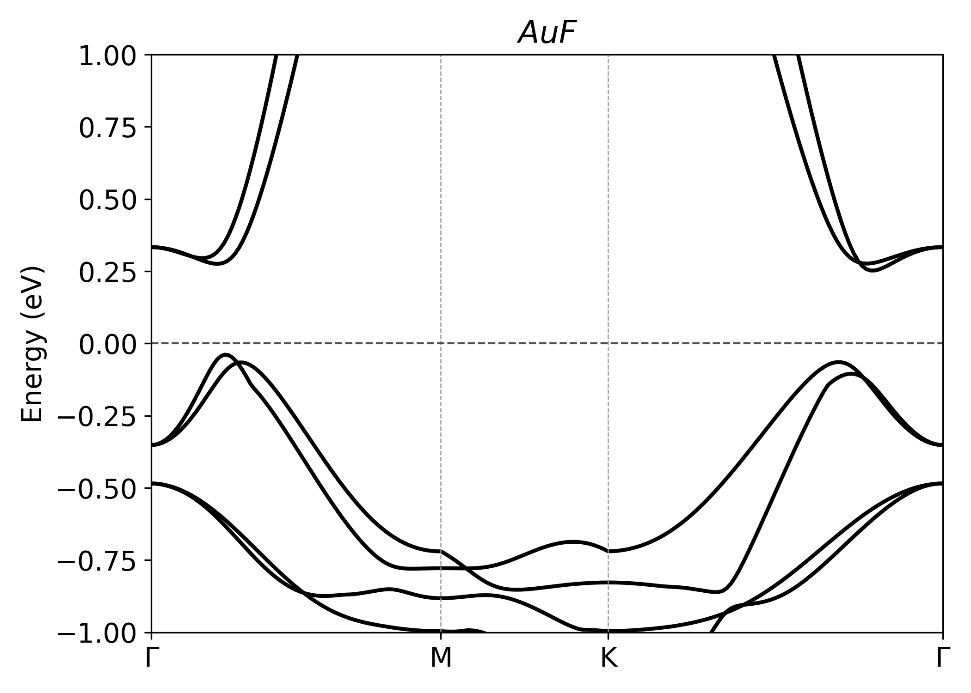


Lattice vectors and band structure of LiTl

|  | *x* (Å) | *y* (Å) | *z* (Å) |
| --- | --- | --- | --- |
| **a1** | 5.0975631200000002 | 0.0000000000000000 | 0.0000000000000000 |
| **a2** | -2.548781560000000 | 4.4139679599999999 | 0.0000000000000000 |
| **a3** | 0.0000000000000000 | 0.0000000000000000 | 25.7673079999999999 |


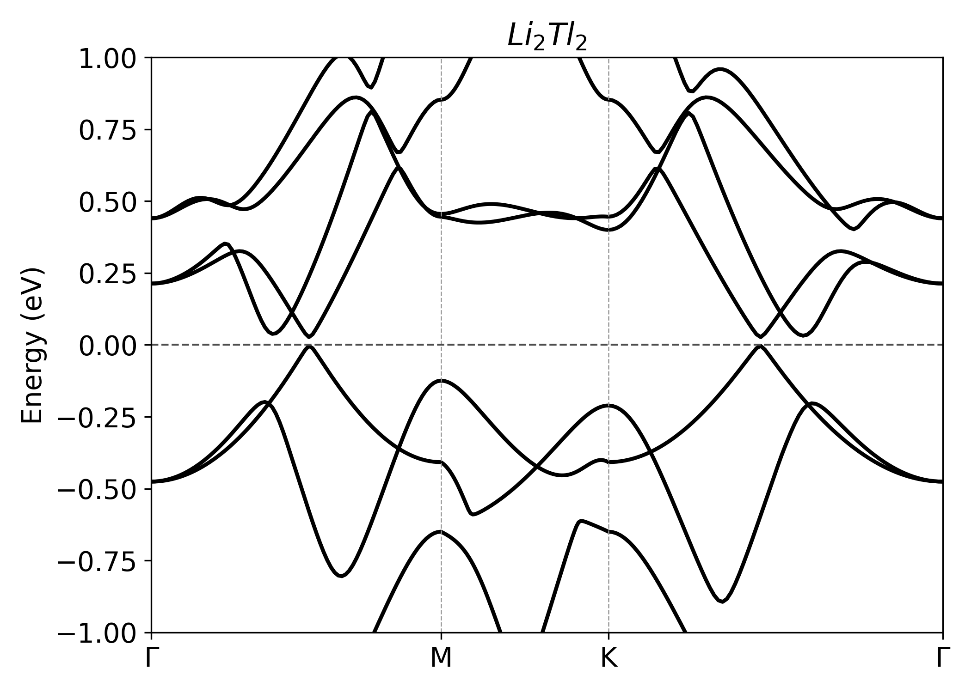


Lattice vectors and band structure of Sn3H

|  | *x* (Å) | *y* (Å) | *z* (Å) |
| --- | --- | --- | --- |
| **a1** | 4.6930519999999998 | 0.0000000000000000 | 0.0000000000000000 |
| **a2** | -2.346527000000000 | 4.0643019999999996 | 0.0000000000000000 |
| **a3** | 0.0000000000000000 | 0.0000000000000000 | 30.1104500000000002 |


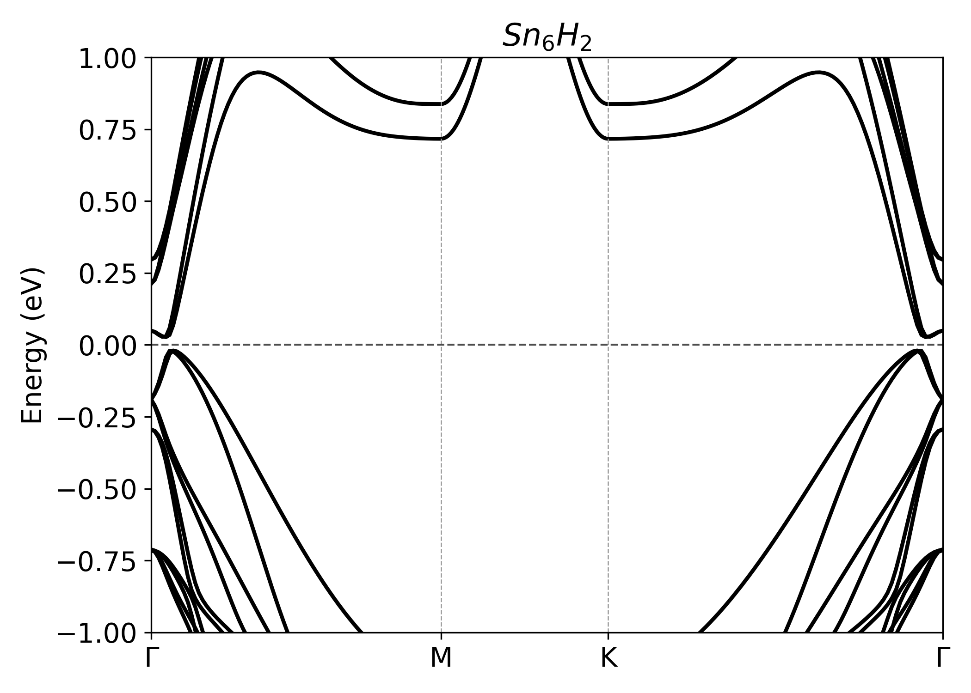


Lattice vectors and band structure of TiTe5

|  | *x* (Å) | *y* (Å) | *z* (Å) |
| --- | --- | --- | --- |
| **a1** | 3.9315979500000000 | 0.0000000000000000 | 0.0000000000000000 |
| **a2** | 0.0000000000000000 | 13.769169850000000 | 0.0000000000000000 |
| **a3** | 0.0000000000000000 | 0.0000000000000000 | 25.2975530000000006 |


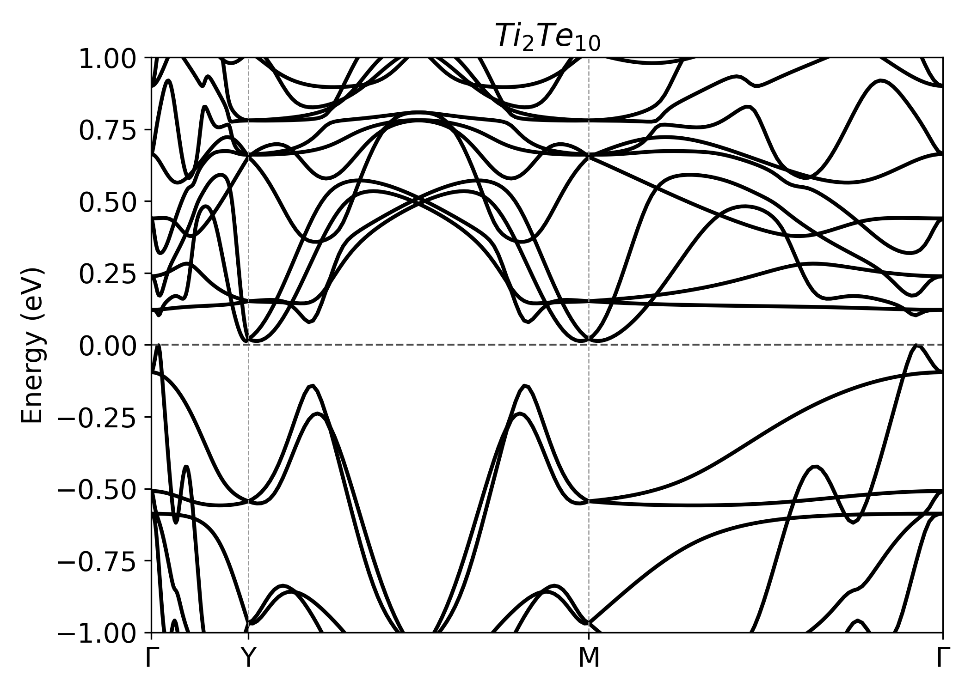


Lattice vectors and band structure of EuP2

|  | *x* (Å) | *y* (Å) | *z* (Å) |
| --- | --- | --- | --- |
| **a1** | 3.5430477300000001 | 0.0000000000000000 | 0.0000000000000000 |
| **a2** | 0.0000000000000000 | 4.8166235100000003 | -0.2578819800000000 |
| **a3** | 0.0000000000000000 | -0.012583350000000 | 23.1727655100000014 |


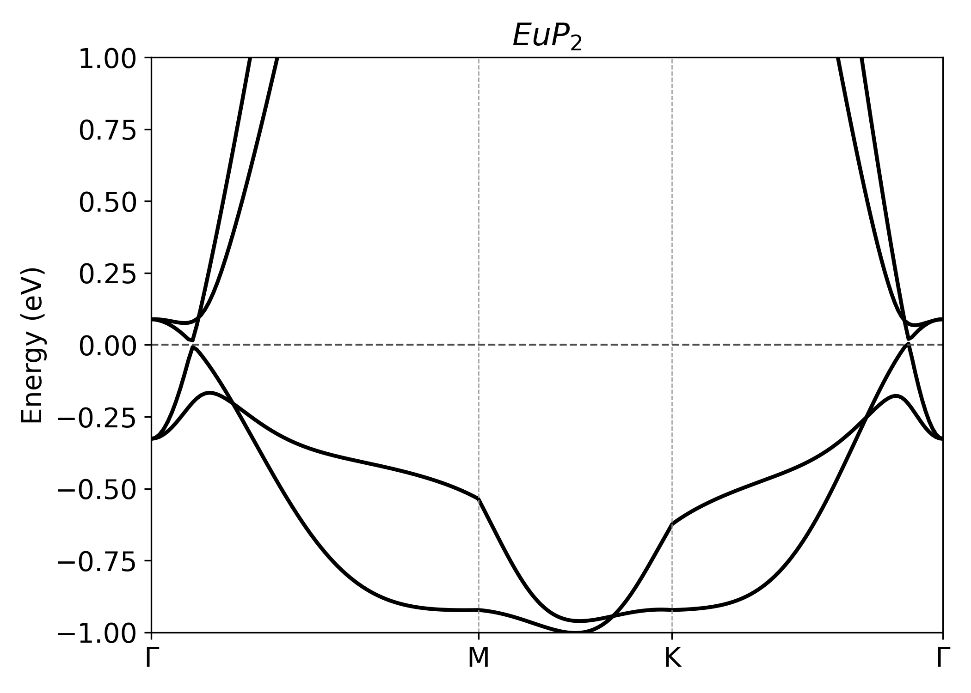


Lattice vectors and band structure of HfS5

|  | *x* (Å) | *y* (Å) | *z* (Å) |
| --- | --- | --- | --- |
| **a1** | 3.5079405399999999 | 0.0000000000000000 | 0.0000000000000000 |
| **a2** | 0.0000000000000000 | 11.6604945999999998 | 0.0000000000000000 |
| **a3** | 0.0000000000000000 | 0.0000000000000000 | 25.3784990000000015 |


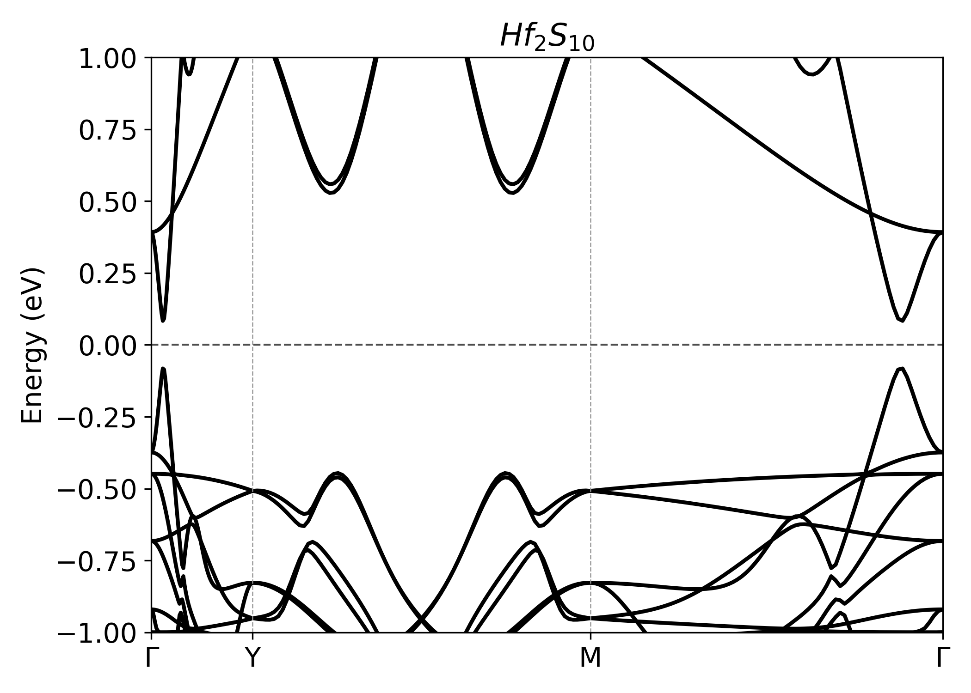


Lattice vectors and band structure of HgS

|  | *x* (Å) | *y* (Å) | *z* (Å) |
| --- | --- | --- | --- |
| **a1** | 4.2852671999999998 | 0.0000000000000000 | 0.0000000000000000 |
| **a2** | -2.142633599999999 | 3.7111499600000002 | 0.0000000000000000 |
| **a3** | 0.0000000000000000 | 0.0000000000000000 | 20.1669300000000007 |


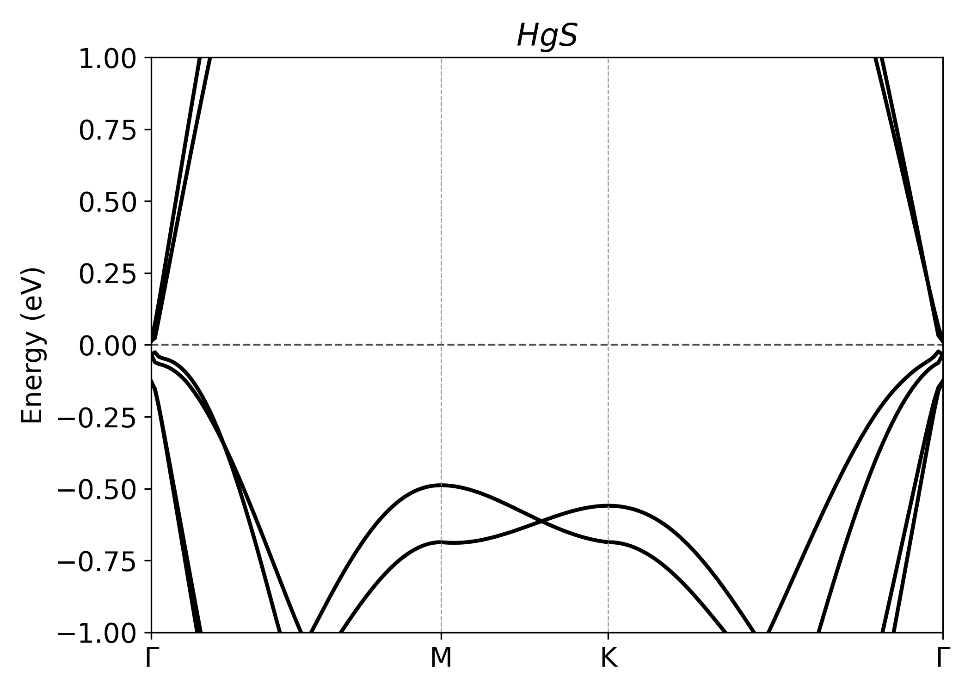


Lattice vectors and band structure of TlSe

|  | *x* (Å) | *y* (Å) | *z* (Å) |
| --- | --- | --- | --- |
| **a1** | 4.2016570000000000 | 0.0000000000000000 | 0.0000000000000000 |
| **a2** | -2.100827000000000 | 3.6387420000000001 | 0.0000000000000000 |
| **a3** | 0.0000000000000000 | 0.0000000000000000 | 24.6231550000000006 |


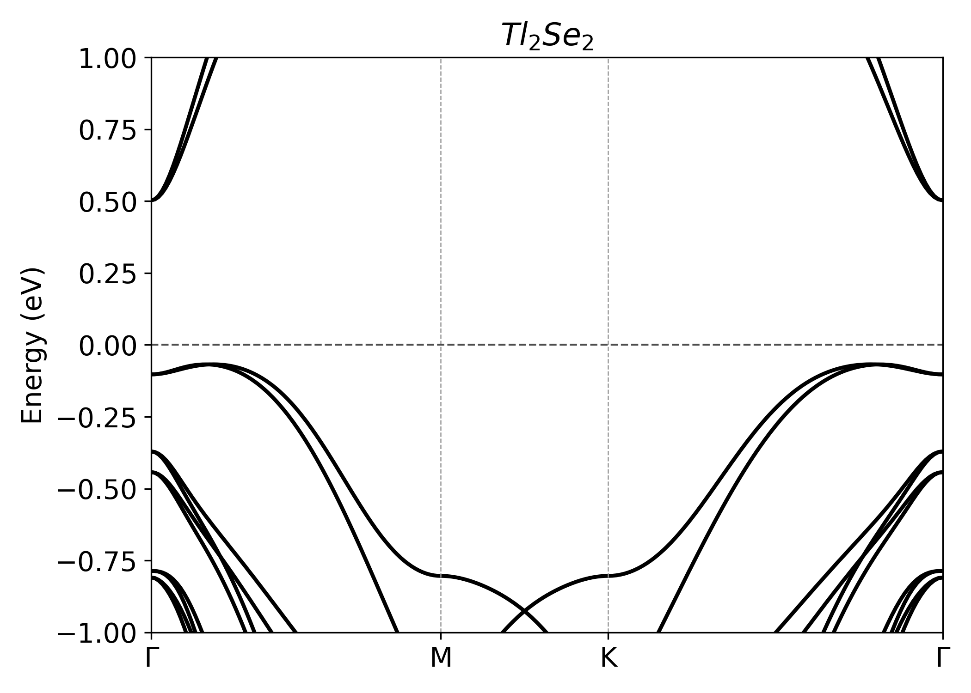


Lattice vectors and band structure of Ta2S3

|  | *x* (Å) | *y* (Å) | *z* (Å) |
| --- | --- | --- | --- |
| **a1** | 3.2360530000000001 | 0.0005720000000000 | -0.0036150000000000 |
| **a2** | 1.6205369999999999 | 9.7229320000000001 | 0.4153560000000000 |
| **a3** | -0.002782000000000 | -0.225844000000000 | 24.9717060000000011 |


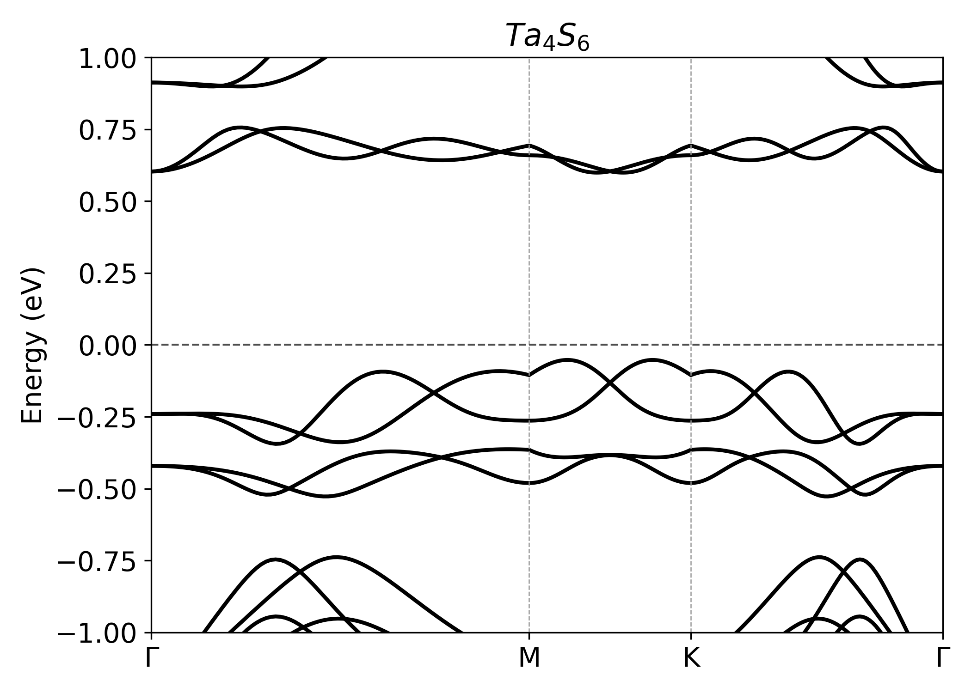


Lattice vectors and band structure of MoAs

|  | *x* (Å) | *y* (Å) | *z* (Å) |
| --- | --- | --- | --- |
| **a1** | 3.2829700000000002 | -0.010893000000000 | 0.1298240000000000 |
| **a2** | 0.0249610000000000 | 3.2830530000000002 | 0.1285130000000000 |
| **a3** | -0.433307000000000 | -0.438465000000000 | 23.6335930000000012 |


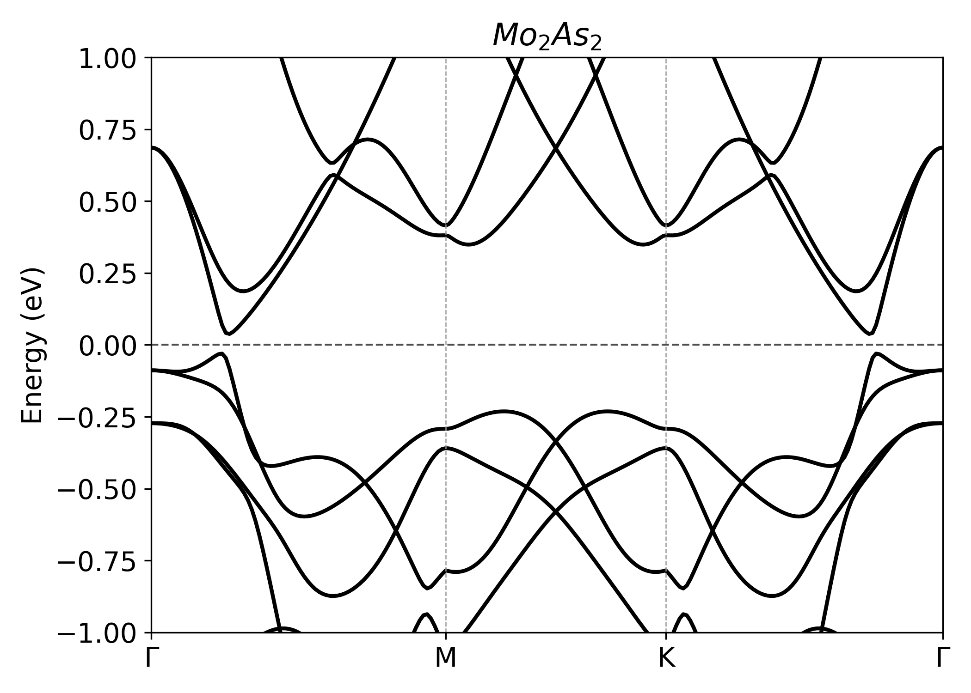


Lattice vectors and band structure of HPb3

|  | *x* (Å) | *y* (Å) | *z* (Å) |
| --- | --- | --- | --- |
| **a1** | 4.9659964800000003 | 0.0000000000000000 | 0.0000000000000000 |
| **a2** | -2.482998740000000 | 4.3006788699999996 | 0.0000000000000000 |
| **a3** | 0.0000000000000000 | 0.0000000000000000 | 30.1104500000000002 |


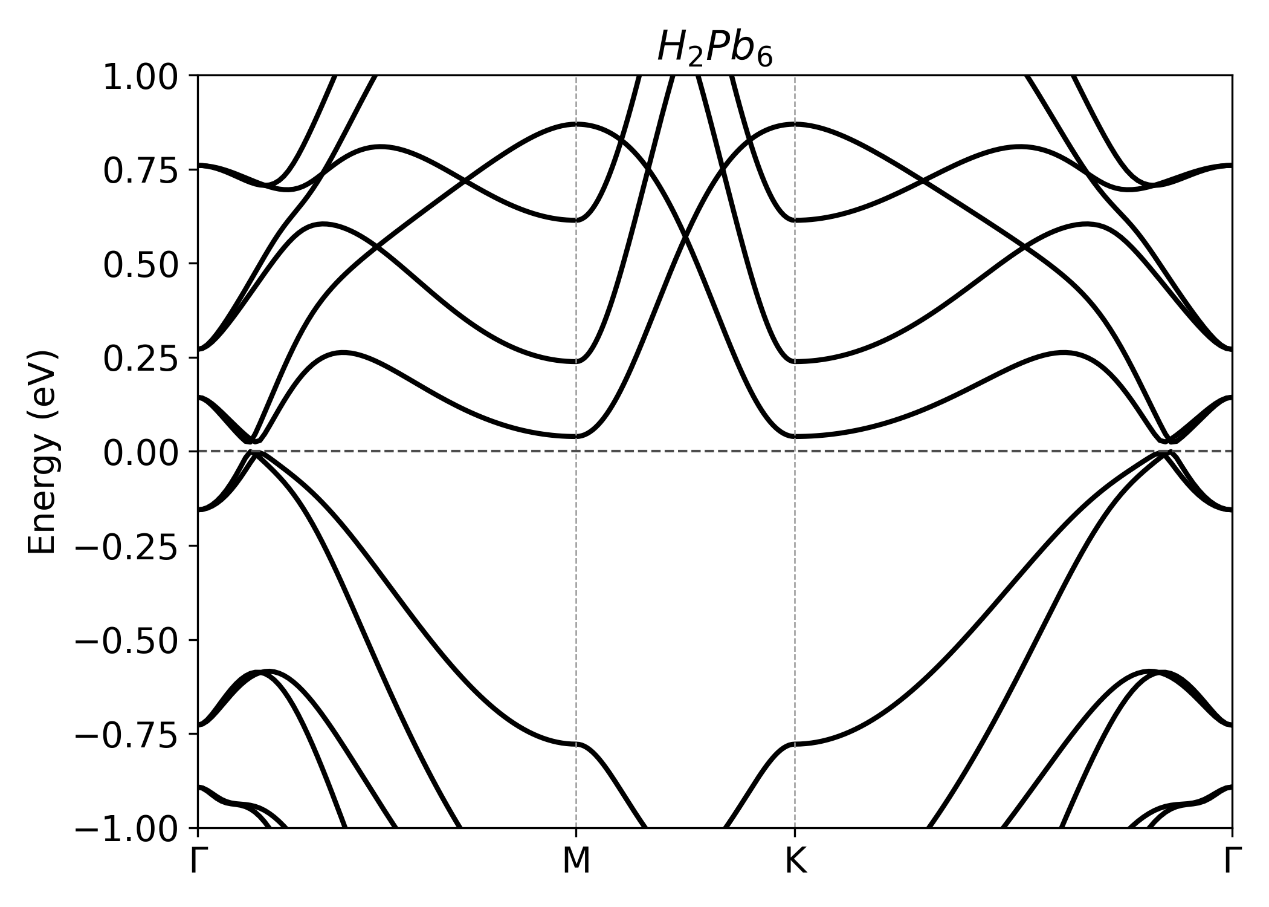


Lattice vectors and band structure of Ag2Te

|  | *x* (Å) | *y* (Å) | *z* (Å) |
| --- | --- | --- | --- |
| **a1** | 4.8222829999999997 | 0.0000000000000000 | 0.0000000000000000 |
| **a2** | -2.411141000000000 | 4.1762189999999997 | 0.0000000000000000 |
| **a3** | 0.0000000000000000 | 0.0000000000000000 | 24.5376949999999994 |


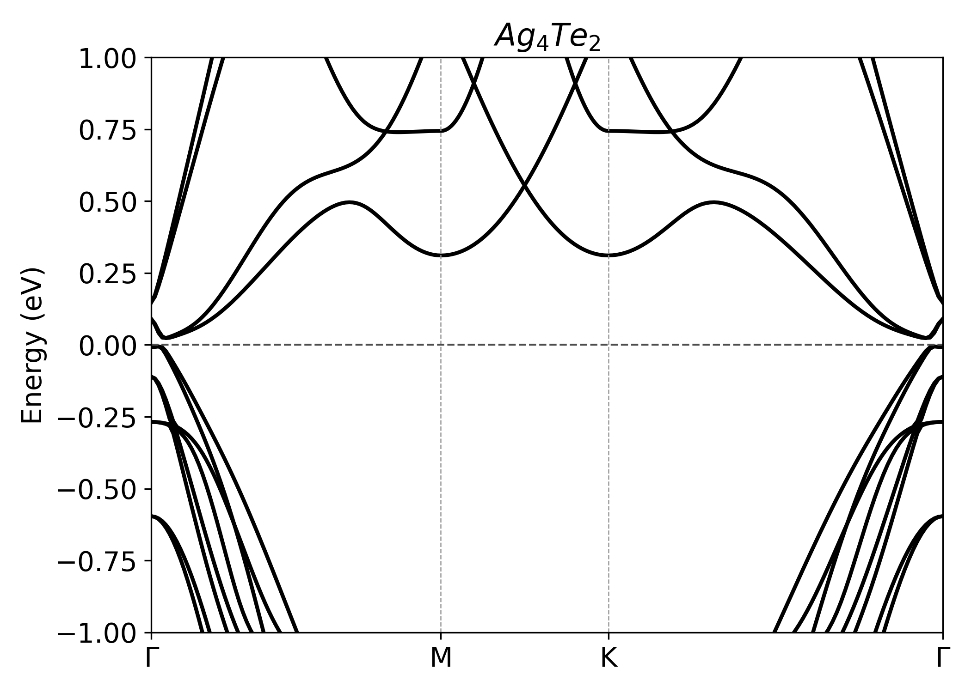


Lattice vectors and band structure of AuCl

|  | *x* (Å) | *y* (Å) | *z* (Å) |
| --- | --- | --- | --- |
| **a1** | 4.2790628799999997 | 0.0000000000000000 | 0.0000000000000000 |
| **a2** | -2.139531949999999 | 3.7057768100000001 | 0.0000000000000000 |
| **a3** | 0.0000000000000000 | 0.0000000000000000 | 20.1955199999999984 |


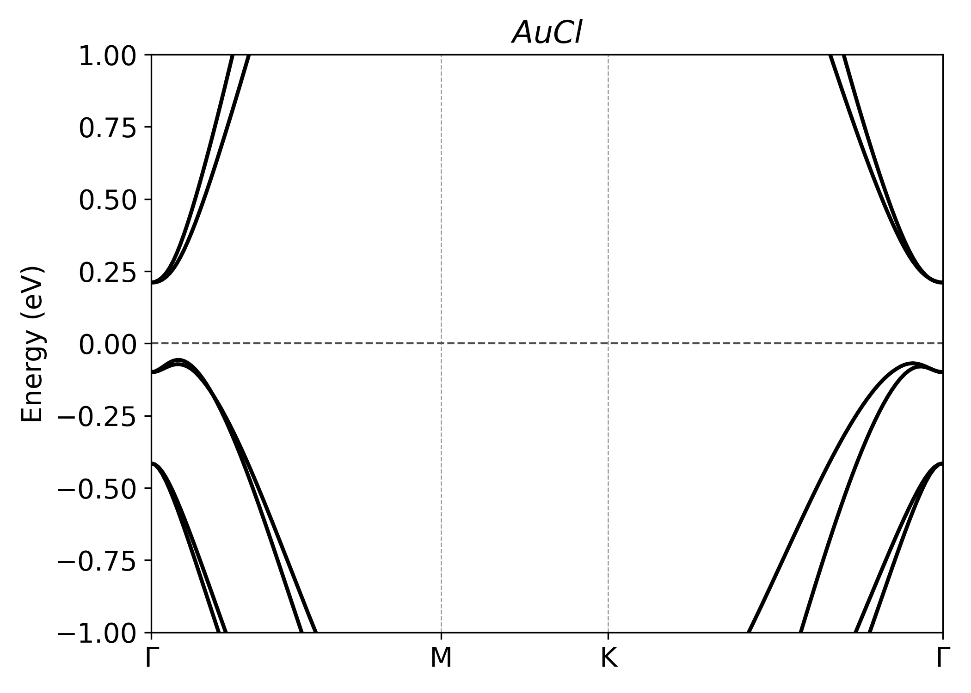


Lattice vectors and band structure of NaMgAs

|  | *x* (Å) | *y* (Å) | *z* (Å) |
| --- | --- | --- | --- |
| **a1** | 4.6329061300000003 | 0.0000000000000000 | 0.0000000000000000 |
| **a2** | 0.0000000000000000 | 4.6329061300000003 | 0.0000000000000000 |
| **a3** | 0.0000000000000000 | 0.0000000000000000 | 29.1230909999999987 |


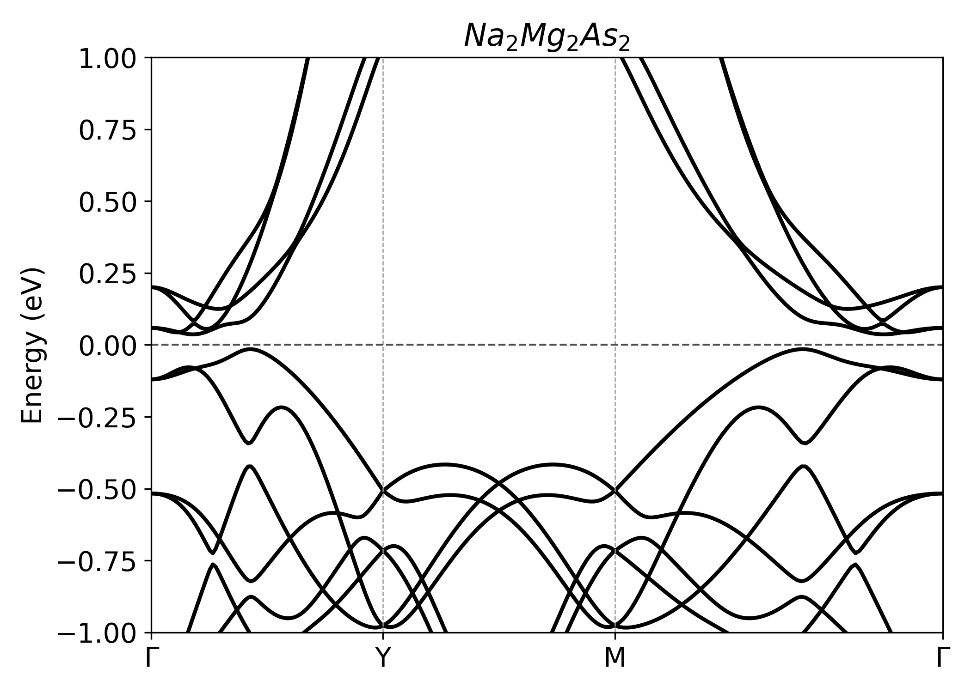


Lattice vectors and band structure of BiTe

|  | *x* (Å) | *y* (Å) | *z* (Å) |
| --- | --- | --- | --- |
| **a1** | 8.2904905099999997 | 0.0000000000000000 | 0.0000000000000000 |
| **a2** | 0.0000000000000000 | 7.5181791899999997 | 0.0000000000000000 |
| **a3** | 0.0000000000000000 | 0.0000000000000000 | 22.0755000000000017 |


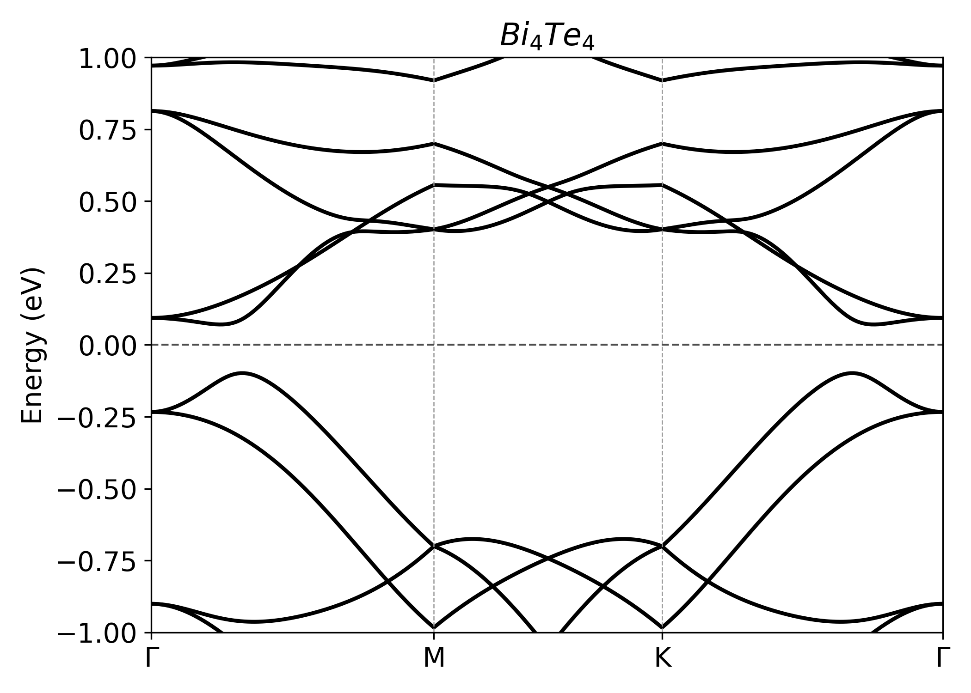


Lattice vectors and band structure of Sb3C

|  | *x* (Å) | *y* (Å) | *z* (Å) |
| --- | --- | --- | --- |
| **a1** | 7.5647808300000001 | 0.0000000000000000 | 0.0000000000000000 |
| **a2** | -3.782390420000000 | 6.5512934300000003 | 0.0000000000000000 |
| **a3** | 0.0000000000000000 | 0.0000000000000000 | 21.4054339999999996 |


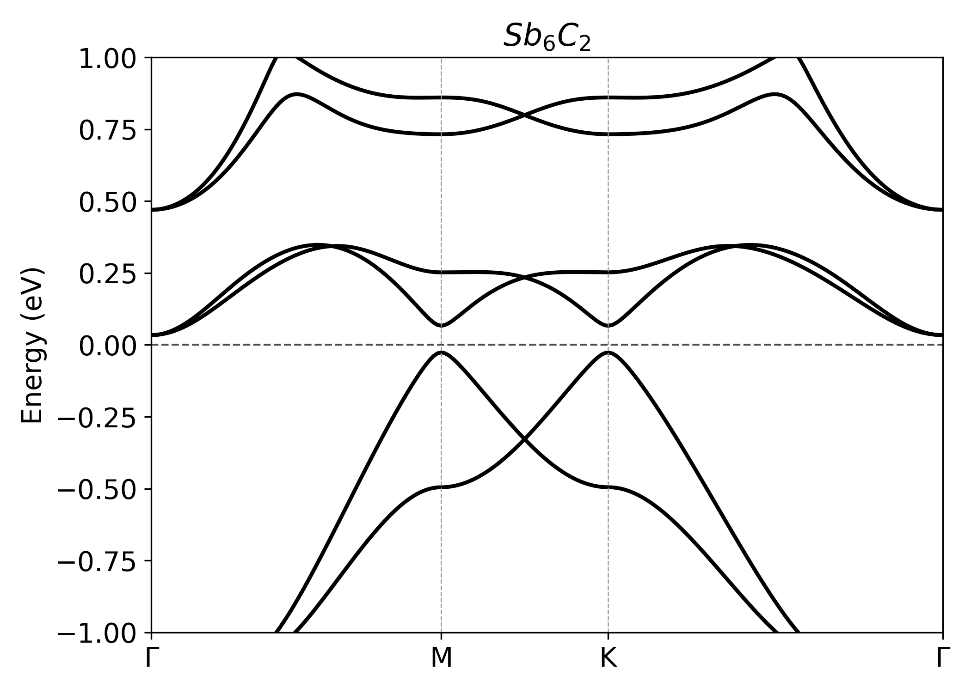


Lattice vectors and band structure of CuF

|  | *x* (Å) | *y* (Å) | *z* (Å) |
| --- | --- | --- | --- |
| **a1** | 3.4678137800000002 | 0.0000000000000000 | 0.0000000000000000 |
| **a2** | -1.733906549999999 | 3.0032146700000002 | 0.0000000000000000 |
| **a3** | 0.0000000000000000 | 0.0000000000000000 | 20.1955199999999984 |


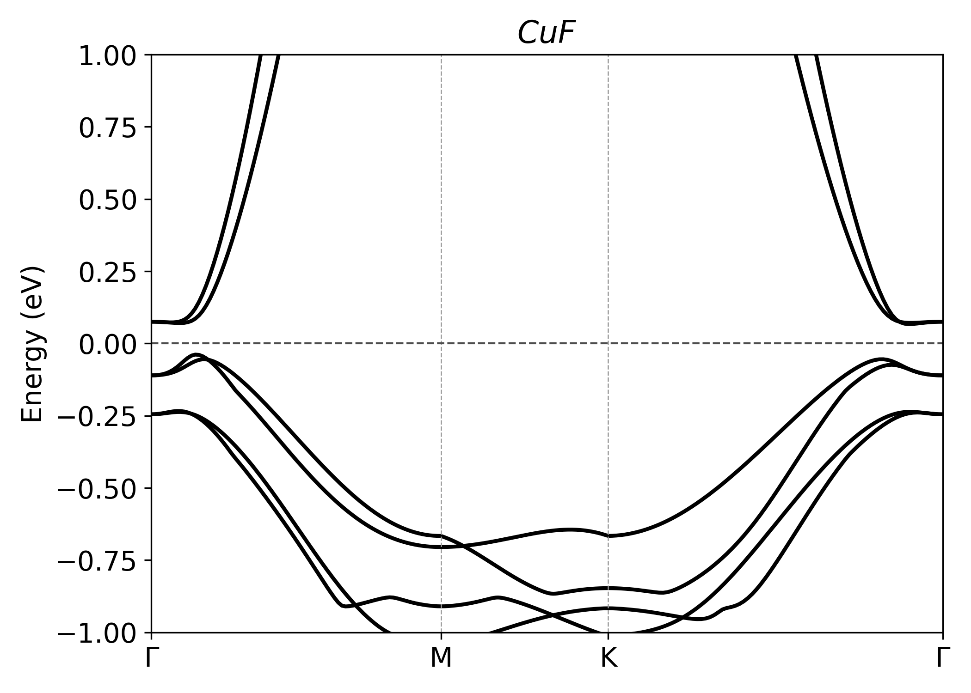


Lattice vectors and band structure of BiBr5

|  | *x* (Å) | *y* (Å) | *z* (Å) |
| --- | --- | --- | --- |
| **a1** | 6.7578703500000001 | 0.0000000000000000 | 0.0000000000000000 |
| **a2** | 0.0000000000000000 | 5.4951828799999998 | 0.0000000000000000 |
| **a3** | 0.0000000000000000 | 0.0000000000000000 | 23.7586060000000003 |


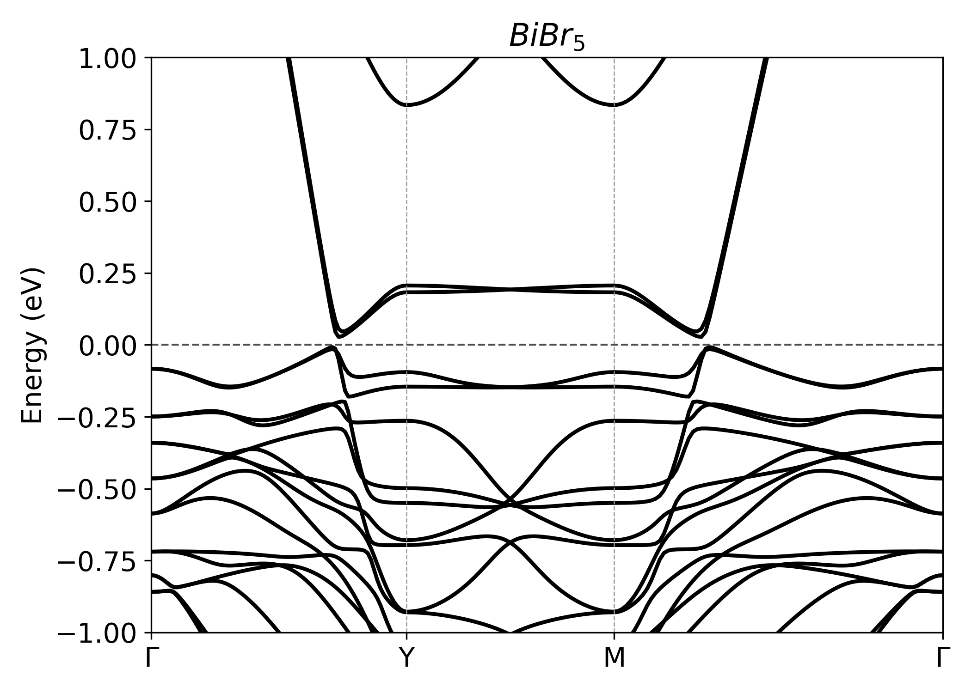


Lattice vectors and band structure of BiSb

|  | *x* (Å) | *y* (Å) | *z* (Å) |
| --- | --- | --- | --- |
| **a1** | 4.4714468900000002 | 0.0091504600000000 | -0.1301007700000000 |
| **a2** | -0.012158070000000 | 4.7960650500000002 | -0.1178978800000000 |
| **a3** | -0.233315400000000 | -0.171815520000000 | 22.4734668299999996 |


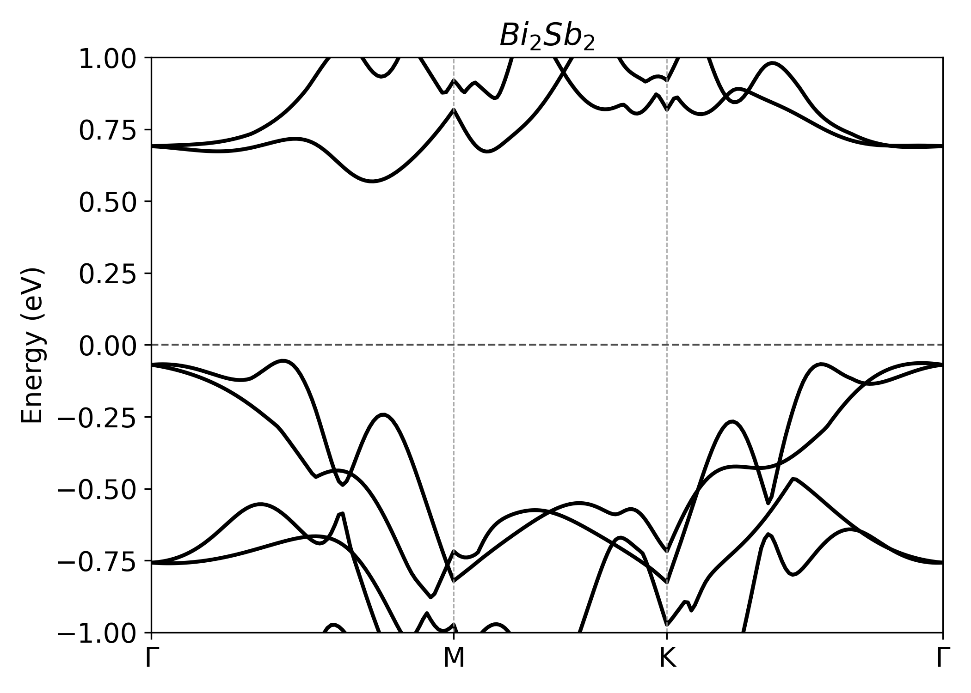


Lattice vectors and band structure of HfBr

|  | *x* (Å) | *y* (Å) | *z* (Å) |
| --- | --- | --- | --- |
| **a1** | 3.4513527700000002 | 0.0054486900000000 | 0.2870285400000000 |
| **a2** | 1.6932485399999999 | 3.0189667899999999 | 0.2815849000000000 |
| **a3** | 0.0331153000000000 | 0.0224347900000000 | 25.9018439700000016 |


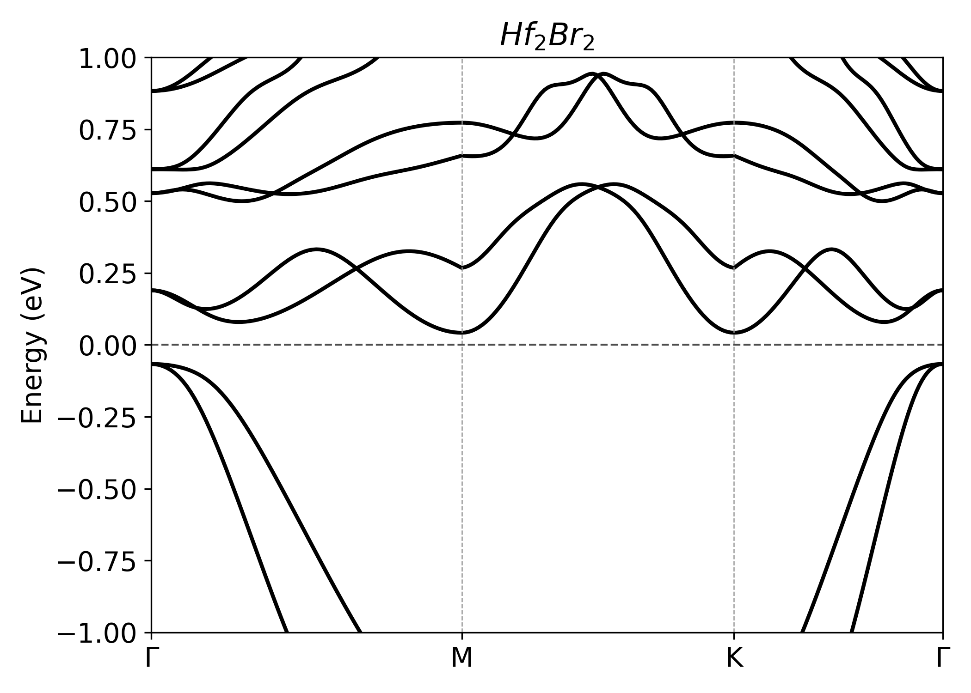


Lattice vectors and band structure of HgTe

|  | *x* (Å) | *y* (Å) | *z* (Å) |
| --- | --- | --- | --- |
| **a1** | 4.7340843699999997 | 0.0000000000000000 | 0.0000000000000000 |
| **a2** | -2.367042179999999 | 4.0998369400000003 | 0.0000000000000000 |
| **a3** | 0.0000000000000000 | 0.0000000000000000 | 20.1669300000000007 |


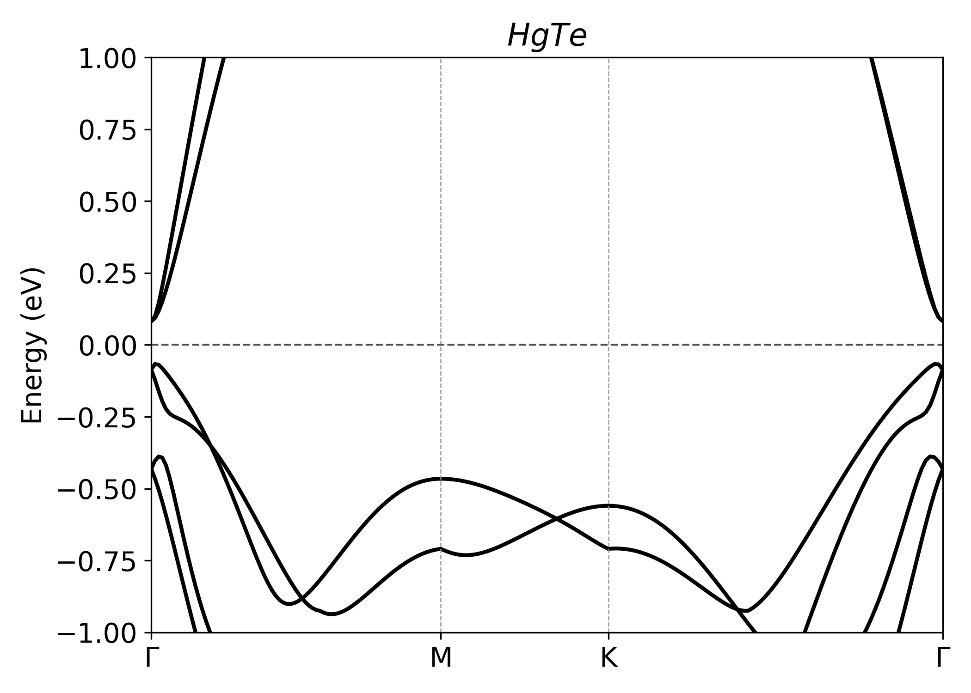


Lattice vectors and band structure of PdI2

|  | *x* (Å) | *y* (Å) | *z* (Å) |
| --- | --- | --- | --- |
| **a1** | 4.9317732899999998 | -0.477987660000000 | 0.3142239800000000 |
| **a2** | 0.5679990600000000 | 4.4664598399999997 | 0.0000000000000000 |
| **a3** | -1.909285820000000 | -1.100534190000000 | 24.8868942400000002 |


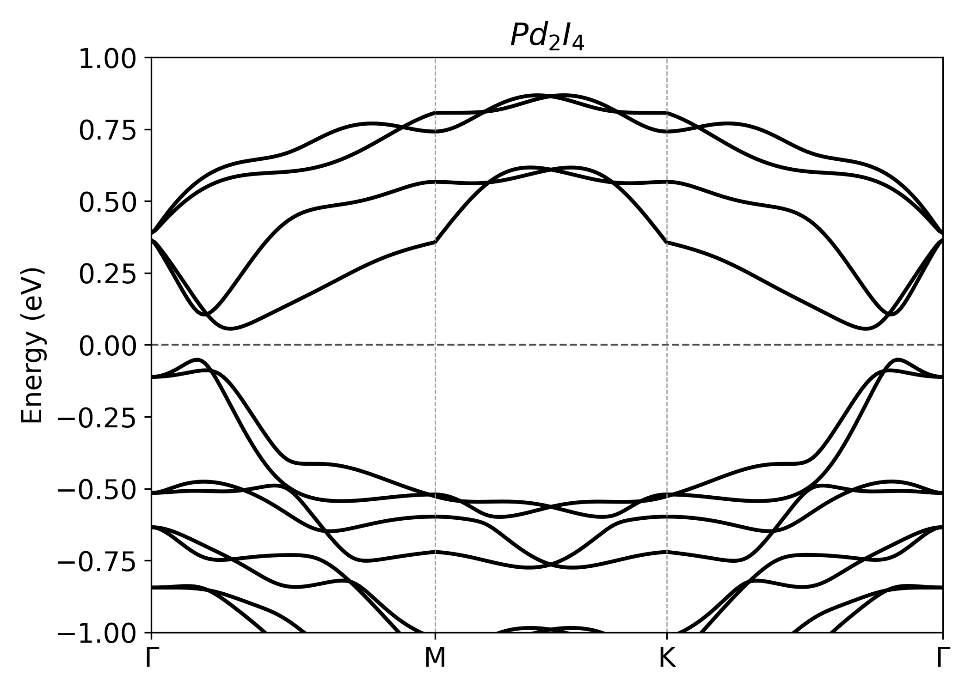


Lattice vectors and band structure of Ca2Ge

|  | *x* (Å) | *y* (Å) | *z* (Å) |
| --- | --- | --- | --- |
| **a1** | 8.1322863099999996 | 0.0310781000000000 | 0.0000000000000000 |
| **a2** | -0.018807730000000 | 8.1141384999999993 | 0.0000000000000000 |
| **a3** | 0.0000000000000000 | 0.0000000000000000 | 24.8868942400000002 |


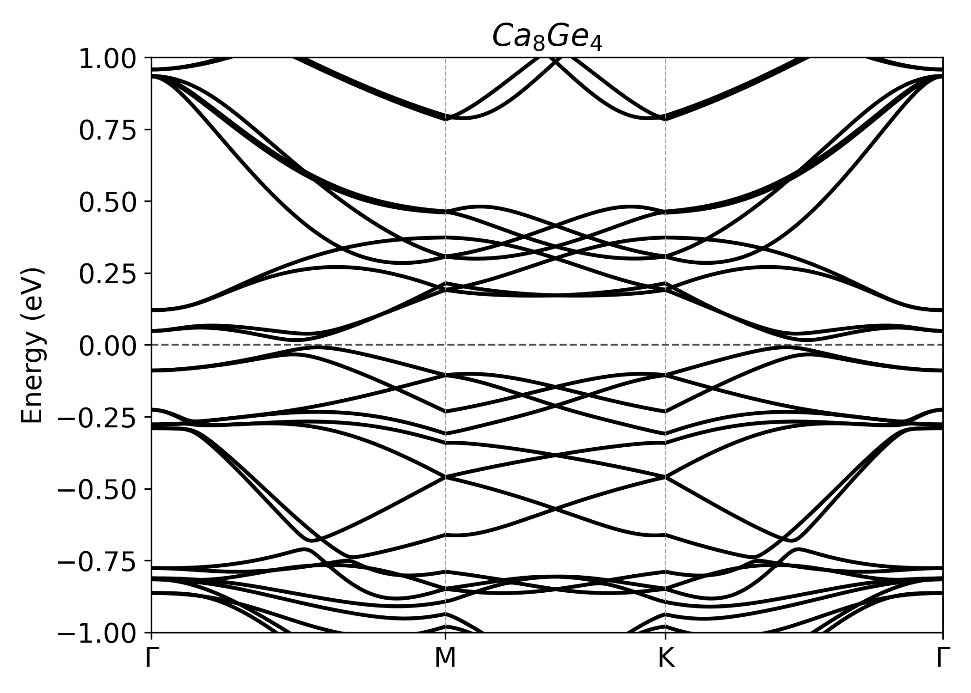


Lattice vectors and band structure of Ta2Se3

|  | *x* (Å) | *y* (Å) | *z* (Å) |
| --- | --- | --- | --- |
| **a1** | 3.3497182099999998 | 0.0005764400000000 | -0.0044203200000000 |
| **a2** | 1.6772771799999999 | 9.9863667599999992 | 0.4387815600000000 |
| **a3** | -0.008642540000000 | -0.168152930000000 | 24.9723825200000000 |


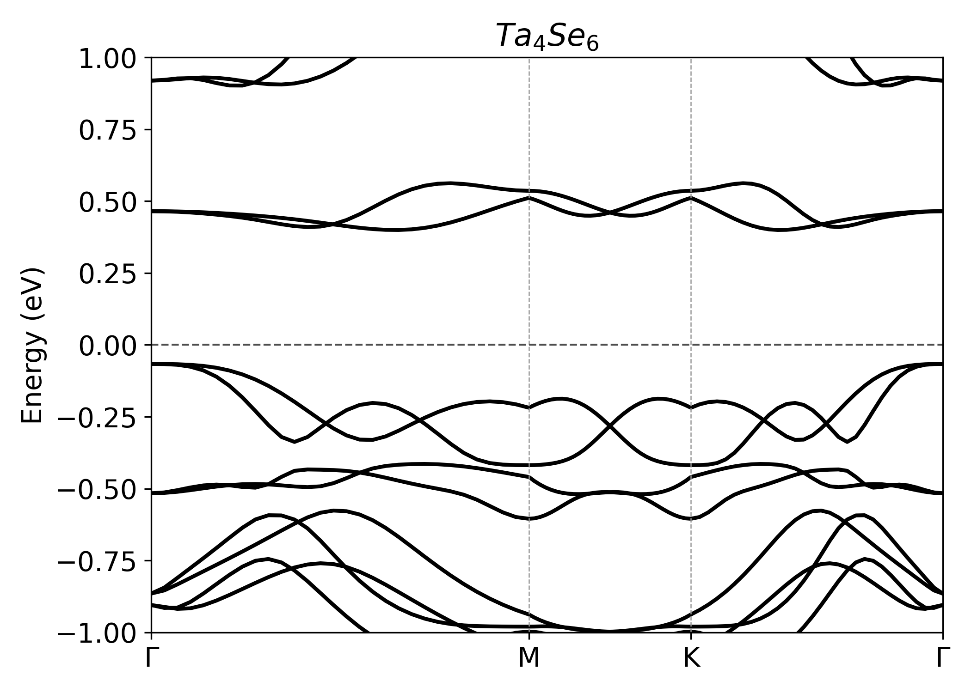


Lattice vectors and band structure of PtI2

|  | *x* (Å) | *y* (Å) | *z* (Å) |
| --- | --- | --- | --- |
| **a1** | 4.9384229700000004 | -0.353924180000000 | 0.3944571100000000 |
| **a2** | 0.7003246800000000 | 4.5552051300000000 | 0.4566458900000000 |
| **a3** | -1.514552050000000 | -0.708540460000000 | 24.8506994600000013 |


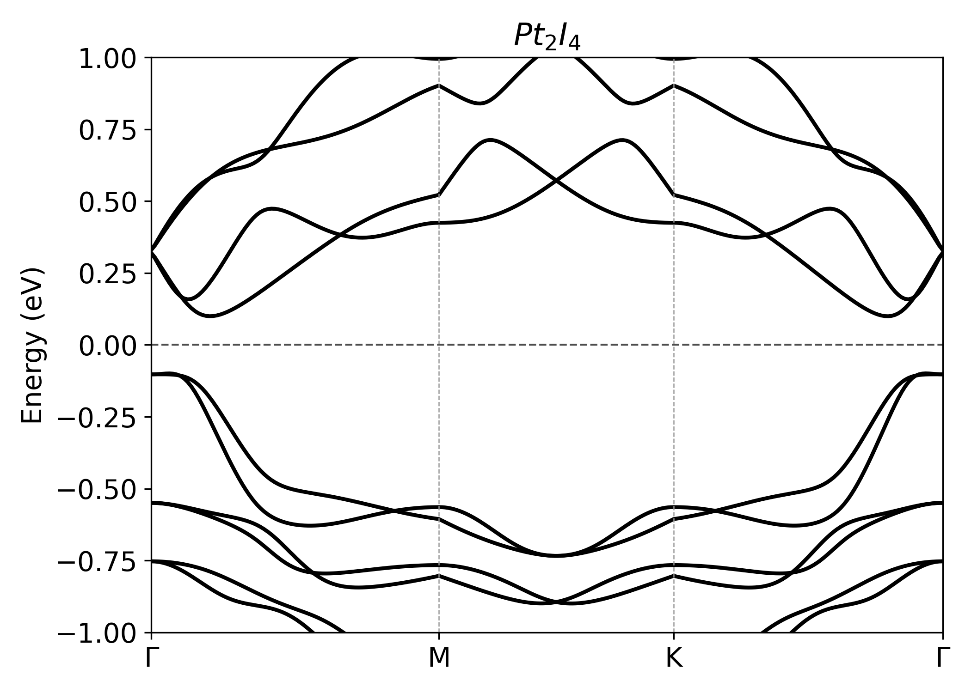


Lattice vectors and band structure of NbI3

|  | *x* (Å) | *y* (Å) | *z* (Å) |
| --- | --- | --- | --- |
| **a1** | 6.9986791899999998 | 0.0000000000000000 | 0.0000000000000000 |
| **a2** | -3.499340100000000 | 6.0610329900000002 | 0.0000000000000000 |
| **a3** | 0.0000000000000000 | 0.0000000000000000 | 24.8506994600000013 |


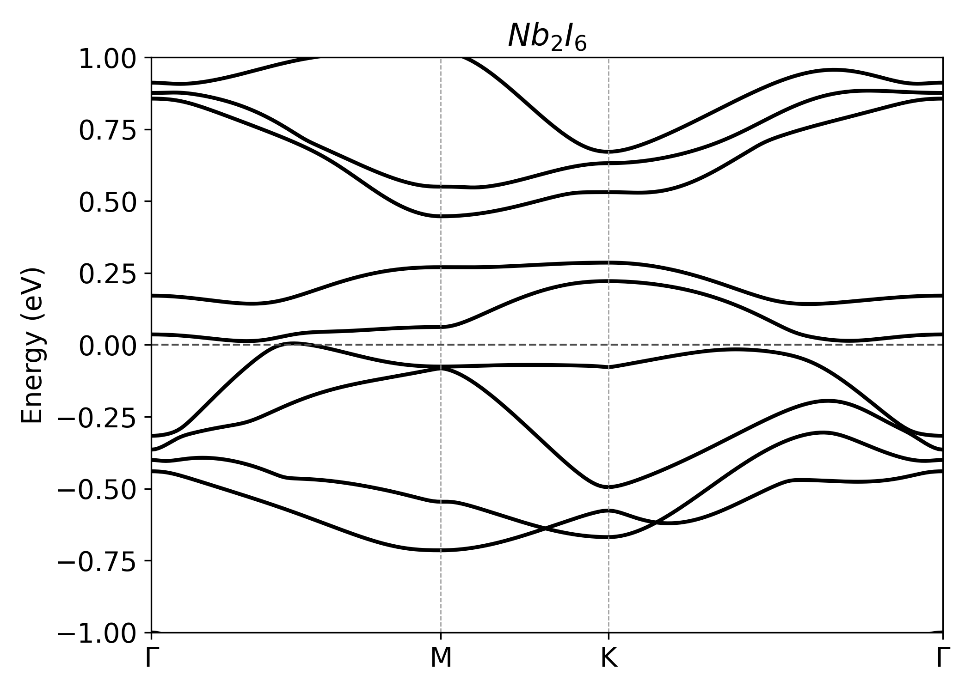


Lattice vectors and band structure of Ta2S3

|  | *x* (Å) | *y* (Å) | *z* (Å) |
| --- | --- | --- | --- |
| **a1** | 3.2360530000000001 | 0.0005720000000000 | -0.003615000000000 |
| **a2** | 1.6205369999999999 | 9.7229320000000001 | 0.4153560000000000 |
| **a3** | -0.002782000000000 | -0.225844000000000 | 24.9717060000000011 |


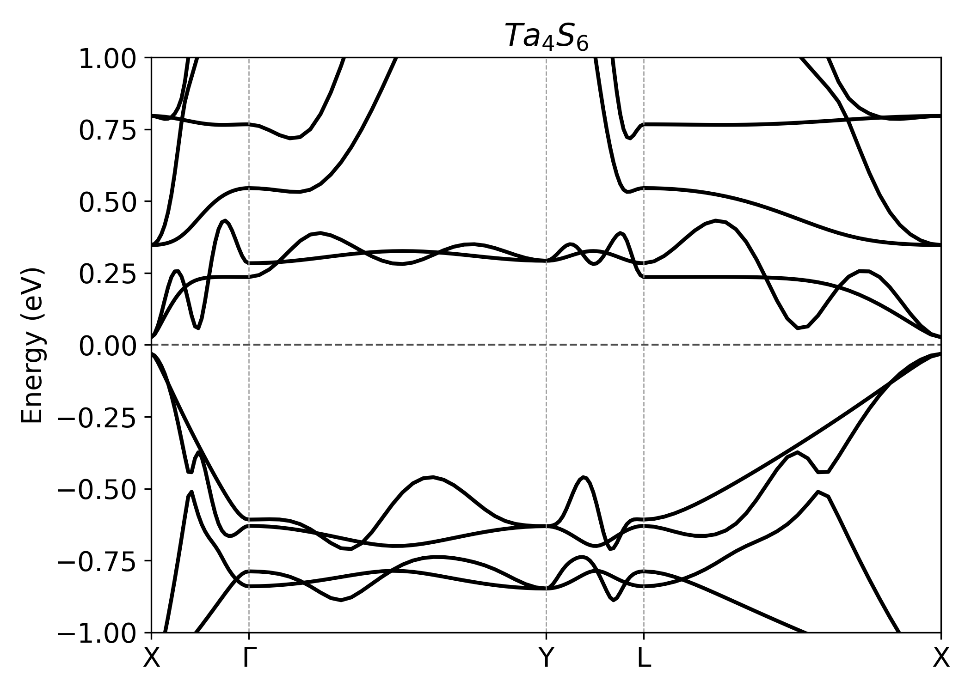


Lattice vectors and band structure of SbBr5

|  | *x* (Å) | *y* (Å) | *z* (Å) |
| --- | --- | --- | --- |
| **a1** | 7.1637636100000002 | -0.040986840000000 | 0.6846067100000000 |
| **a2** | -0.048077300000000 | 5.5449332699999996 | -0.0160568300000000 |
| **a3** | 2.0902358300000001 | 0.0128197600000000 | 23.8037616800000009 |


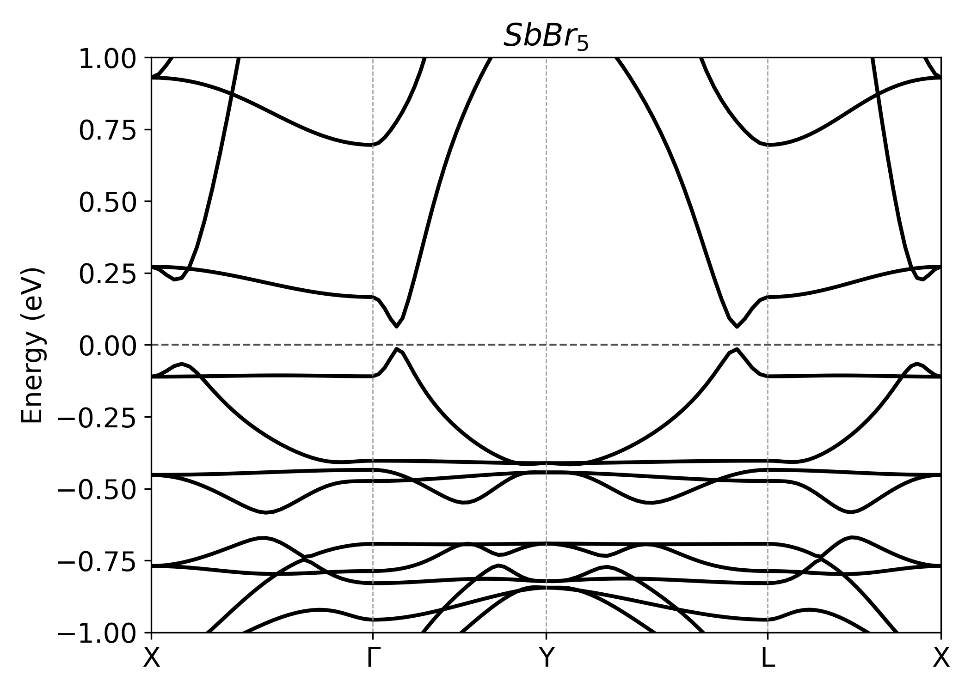


Lattice vectors and band structure of Ta2Se3

|  | *x* (Å) | *y* (Å) | *z* (Å) |
| --- | --- | --- | --- |
| **a1** | 3.3917088500000001 | 0.0000000000000000 | 0.0000000000000000 |
| **a2** | 0.0000000000000000 | 9.8513192200000006 | 0.0000000000000000 |
| **a3** | 0.0000000000000000 | 0.0000000000000000 | 23.7671069999999993 |


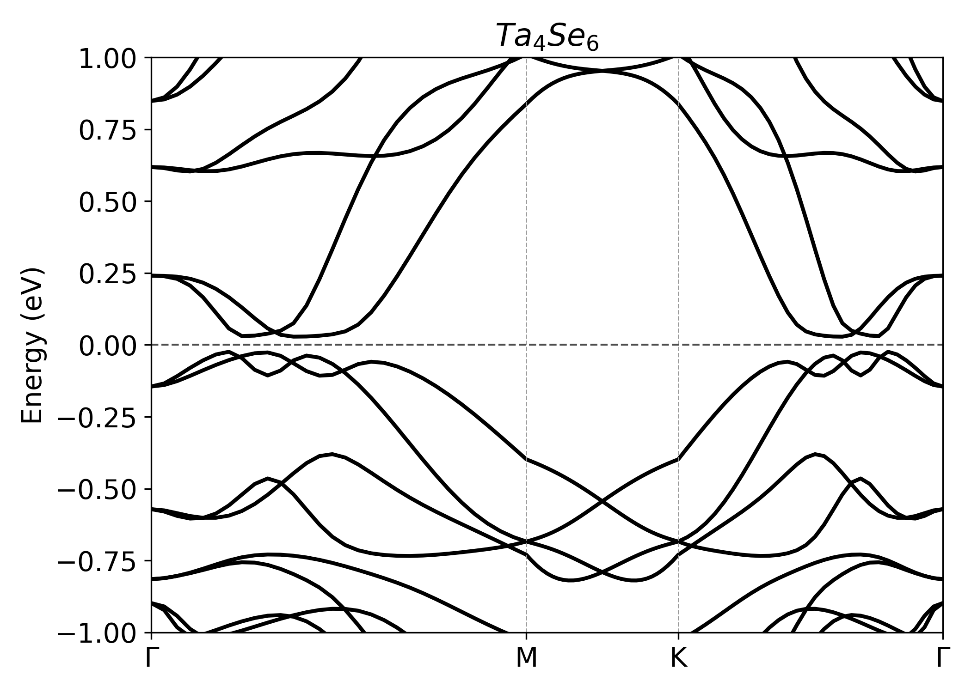

Supplement: Supplementary file 1 [file efa2dd9455a597a82c39b4fb.docx]
